# Supplementary material for: Intramolecular C–H oxidative addition to iridium(i) triggered by trimethyl phosphite in N,N′-diphosphanesilanediamine complexes
Source: Royal Society of Chemistry journal article supplement (doi:10.1039/c5dt02886h), 2015-01-01
Supplement: c5dt02886h1.pdf [file c5dt02886h1.pdf]

## Electronic Supplementary Information

# Intramolecular C–H oxidative addition to iridium(I) triggered by trimethyl phosphite in *N,N'*-diphophanesilanediamine complexes

Vincenzo Passarelli,<sup>a,b,\*</sup> Jesús J. Pérez-Torrente<sup>b</sup> and Luis A. Oro<sup>b</sup>

<sup>a</sup> Centro Universitario de la Defensa, Ctra. Huesca s/n, ES-50090 Zaragoza, Spain.

<sup>b</sup> Departamento de Química Inorgánica, Instituto de Síntesis Química y Catálisis Homogénea (ISQCH), Universidad de Zaragoza-CSIC, C/ Pedro Cerbuna 12, ES-50009 Zaragoza, Spain.

|                                                                                                                              |    |
|------------------------------------------------------------------------------------------------------------------------------|----|
| 1. Selected kinetic data for [Ir(SiNP){P(OMe) <sub>3</sub> }(cod)][PF <sub>6</sub> ] ( <b>[2]</b> [PF <sub>6</sub> ])        | 1  |
| 2. Selected NMR data of [IrH(SiNP–H){P(OMe) <sub>3</sub> } <sub>2</sub> ][PF <sub>6</sub> ] ( <b>[3]</b> [PF <sub>6</sub> ]) | 3  |
| 3. Selected NMR data for the evolution of [Ir(SiNP){P(OMe) <sub>3</sub> }(cod)]Cl ( <b>[2]</b> Cl) at 298 K                  | 4  |
| 4. Atomic coordinates of calculated molecular structures                                                                     | 7  |
| ▪ [Ir(SiNP){P(OMe) <sub>3</sub> }(cod)] <sup>+</sup> ( <b>2</b> <sup>+</sup> , SPY-5-13)                                     | 7  |
| ▪ [Ir(SiNP){P(OMe) <sub>3</sub> }(cod)] <sup>+</sup> ( <b>2</b> <sup>+</sup> , TBPY-5-13)                                    | 8  |
| ▪ [IrH(SiNP–H){P(OMe) <sub>3</sub> } <sub>2</sub> ] <sup>+</sup> ( <b>3</b> <sup>+</sup> )                                   | 9  |
| ▪ [Ir(SiNP){P(OMe) <sub>3</sub> ] <sub>2</sub> ] <sup>+</sup> ( <b>4</b> <sup>+</sup> )                                      | 10 |
| ▪ <b>TS_4<sup>+</sup>_3<sup>+</sup></b>                                                                                      | 11 |
| ▪ [Ir(SiNP)(CO)(cod)] <sup>+</sup>                                                                                           | 12 |
| ▪ IrCl(SiNP)(CO)                                                                                                             | 13 |
| ▪ IrHCl(SiNP–H)(CO)                                                                                                          | 14 |
| ▪ <b>TS_CO</b>                                                                                                               | 15 |
| ▪ IrHCl(SiNP–H){P(OMe) <sub>3</sub> } ( <b>6</b> , OC-6-43)                                                                  | 16 |
| ▪ IrHCl(SiNP–H){P(OMe) <sub>3</sub> } ( <b>6'</b> , OC-6-34)                                                                 | 17 |
| ▪ IrCl(SiNP){P(OMe) <sub>3</sub> } ( <b>7</b> )                                                                              | 18 |
| ▪ <b>TS_7_6'</b>                                                                                                             | 19 |
| ▪ <b>TS_7_6</b>                                                                                                              | 20 |
| ▪ RhCl(SiNP){P(OMe) <sub>3</sub> } ( <b>8</b> )                                                                              | 21 |

# 1. Selected kinetic data for $[\text{Ir}(\text{SiNP})\{\text{P}(\text{OMe})_3\}(\text{cod})][\text{PF}_6]$ ( $[\mathbf{2}][\text{PF}_6]$ )

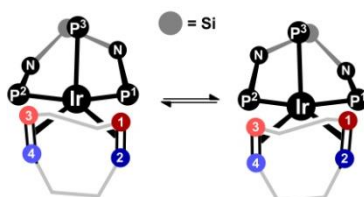

**Scheme S1.** Left-right exchange at the SiNP and cod ligands of  $[\text{Ir}(\text{SiNP})\{\text{P}(\text{OMe})_3\}(\text{cod})]^+$  ( $\mathbf{2}^+$ ) in  $\text{CD}_2\text{Cl}_2$ .

**Table S1.** Kinetic constants obtained from the line shape analysis of the  $^{31}\text{P}\{^1\text{H}\}$  NMR spectra of  $[\text{Ir}(\text{SiNP})\{\text{P}(\text{OMe})_3\}(\text{cod})][\text{PF}_6]$  ( $[\mathbf{2}][\text{PF}_6]$ ) in  $\text{CD}_2\text{Cl}_2$ .

| T (K) | k (sec <sup>-1</sup> ) |
|-------|------------------------|
| 188   | $3.00 \cdot 10^{-1}$   |
| 193   | $7.50 \cdot 10^{-2}$   |
| 198   | $1.60 \cdot 10^{-2}$   |
| 203   | $4.20 \cdot 10^{-2}$   |
| 208   | $8.50 \cdot 10^{-2}$   |
| 213   | $1.90 \cdot 10^{-3}$   |
| 218   | $6.50 \cdot 10^{-3}$   |
| 223   | $2.60 \cdot 10^{-4}$   |
| 228   | $9.50 \cdot 10^{-4}$   |

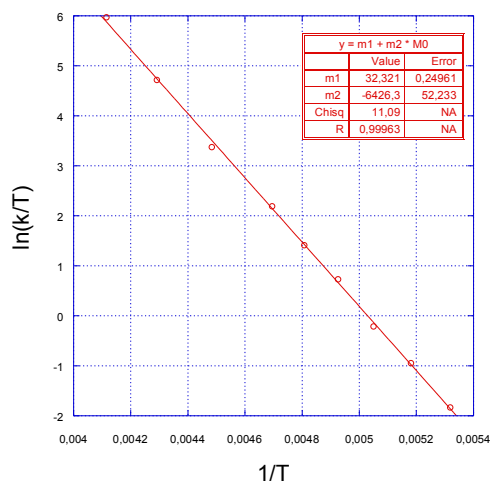

**Fig. S1.** Eyring plot for the left-right exchange at the SiNP and cod ligands of  $[\text{Ir}(\text{SiNP})\{\text{P}(\text{OMe})_3\}(\text{cod})][\text{PF}_6]$  ( $[\mathbf{2}][\text{PF}_6]$ ) in  $\text{CD}_2\text{Cl}_2$ ;  $\Delta H^\ddagger = 53.6 \pm 0.4 \text{ kJ} \cdot \text{mol}^{-1}$ ;  $\Delta S^\ddagger = 71.2 \pm 2.0 \text{ J} \cdot \text{mol}^{-1} \cdot \text{K}^{-1}$ .

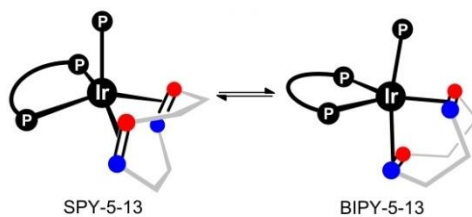

**Scheme S2.** *Up-down* exchange at the cod ligand of  $[\text{Ir}(\text{SiNP})\{\text{P}(\text{OMe})_3\}(\text{cod})]^+$  ( $\mathbf{2}^+$ ) in  $\text{CD}_2\text{Cl}_2$ .

**Table S2.** Kinetic constants obtained from  $^1\text{H}$ - $^1\text{H}$  EXSY spectrum of  $[\text{Ir}(\text{SiNP})\{\text{P}(\text{OMe})_3\}(\text{cod})][\text{PF}_6]$  ( $\mathbf{[2]}[\text{PF}_6]$ ) in  $\text{CD}_2\text{Cl}_2$ .

| T (K) | k (sec <sup>-1</sup> ) |
|-------|------------------------|
| 203   | 3.60                   |
| 208   | 6.45                   |
| 213   | 13.3                   |
| 223   | 37.7                   |

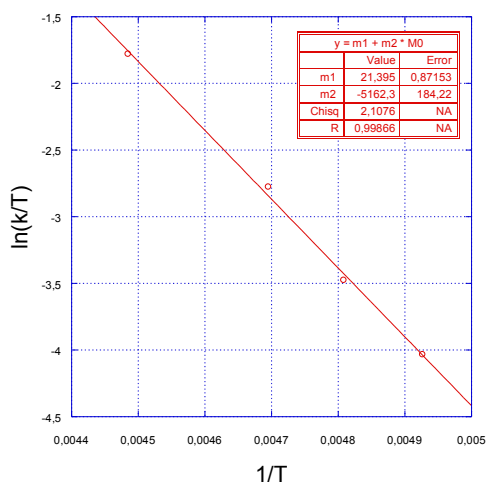

**Fig. S2.** Eyring plot for the *up-down* exchange at the cod ligand of  $[\text{Ir}(\text{SiNP})\{\text{P}(\text{OMe})_3\}(\text{cod})][\text{PF}_6]$  ( $\mathbf{[2]}[\text{PF}_6]$ ) in  $\text{CD}_2\text{Cl}_2$ ;  $\Delta H^\ddagger = 42.7 \pm 1.7 \text{ kJ}\cdot\text{mol}^{-1}$ ;  $\Delta S^\ddagger = 19.6 \pm 7.1 \text{ J}\cdot\text{mol}^{-1}\cdot\text{K}^{-1}$ .

## 2. Selected NMR data of $[\text{IrH}(\text{SiNP-H})\{\text{P}(\text{OMe})_3\}_2][\text{PF}_6]$ (**[3]** $[\text{PF}_6]$ )

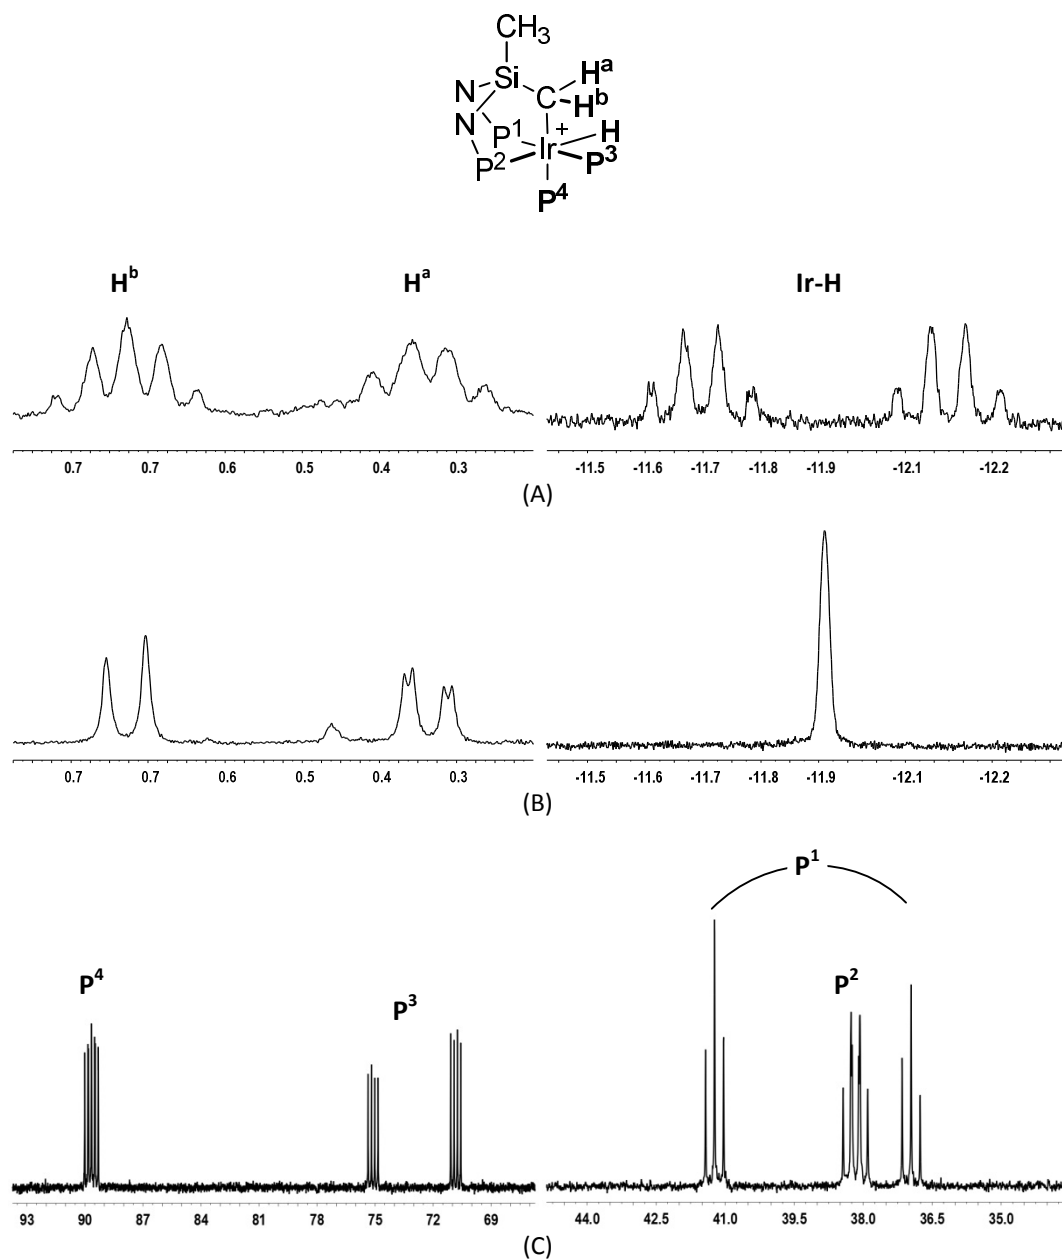

**Fig. S3.** Selected regions of the  $^1\text{H}$  NMR (A),  $^1\text{H}\{^{31}\text{P}\}$  (B) and  $^{31}\text{P}\{^1\text{H}\}$  (C) spectra of  $[\text{IrH}(\text{SiNP-H})\{\text{P}(\text{OMe})_3\}_2][\text{PF}_6]$  (**[3]** $[\text{PF}_6]$ ) (298 K,  $\text{CD}_2\text{Cl}_2$ ) with the proposed assignment.

### 3. Selected NMR data for the evolution of $[\text{Ir}(\text{SiNP})\{\text{P}(\text{OMe})_3\}(\text{cod})]\text{Cl}$ ( $[\mathbf{2}]\text{Cl}$ ) at 298 K

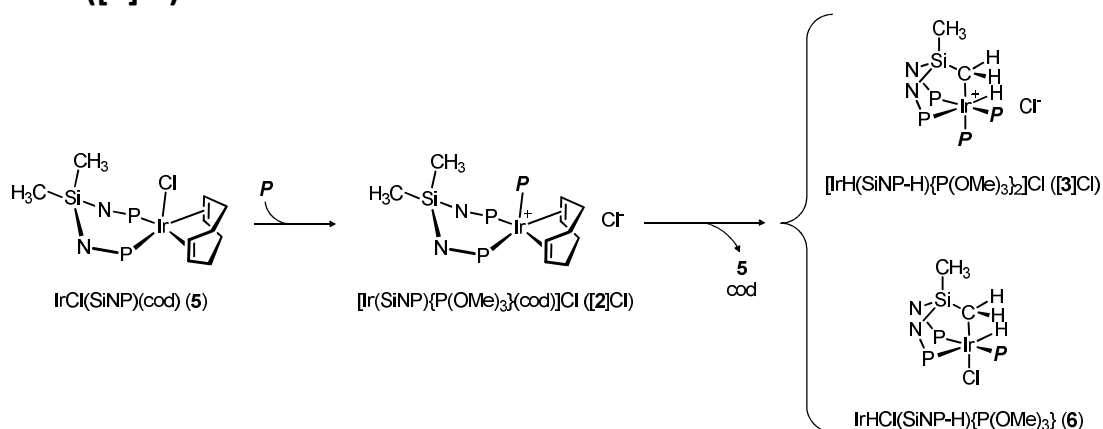

**Scheme S3.** Reaction of  $\text{IrCl}(\text{SiNP})(\text{cod})$  (**5**) with  $\text{P}(\text{OMe})_3$  (1:1) affording  $[\mathbf{3}]\text{Cl}$  and **6** (298 K).

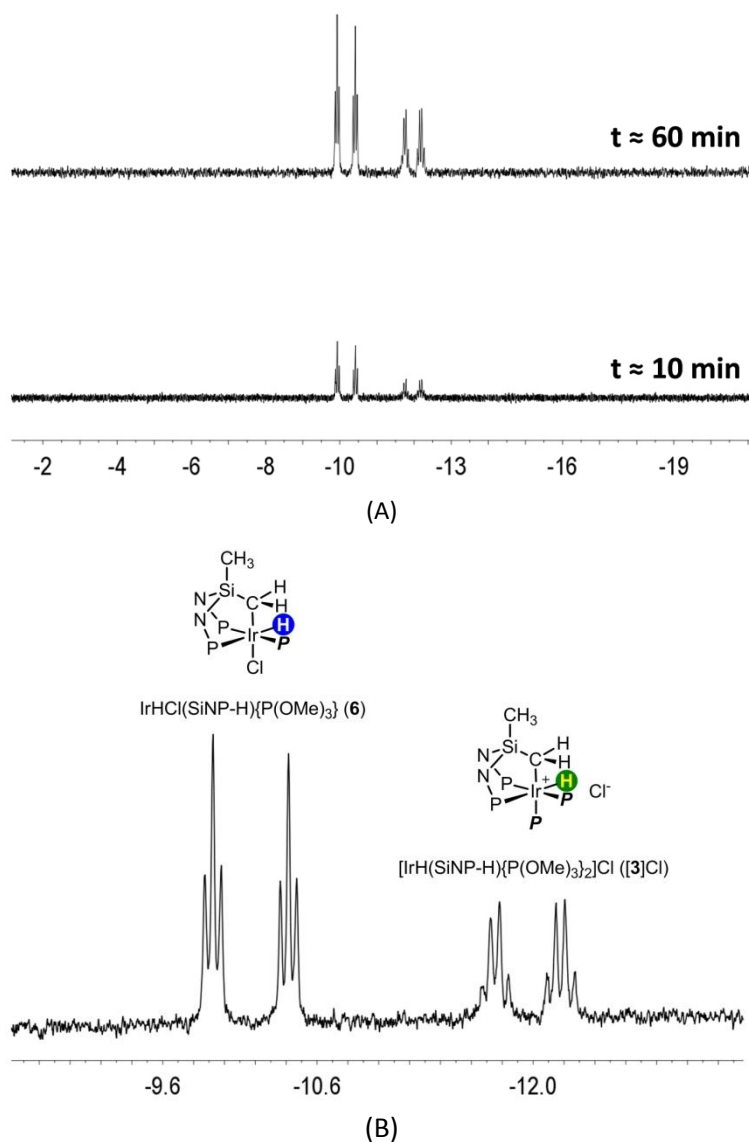

**Figure S4.** (A) Up-field region of the  $^1\text{H}$  NMR spectra at different times after adding  $\text{P}(\text{OMe})_3$  to  $\text{IrCl}(\text{SiNP})(\text{cod})$  (**5**) (1:1,  $\text{CDCl}_3$ , 298 K) and (B) the proposed assignment.

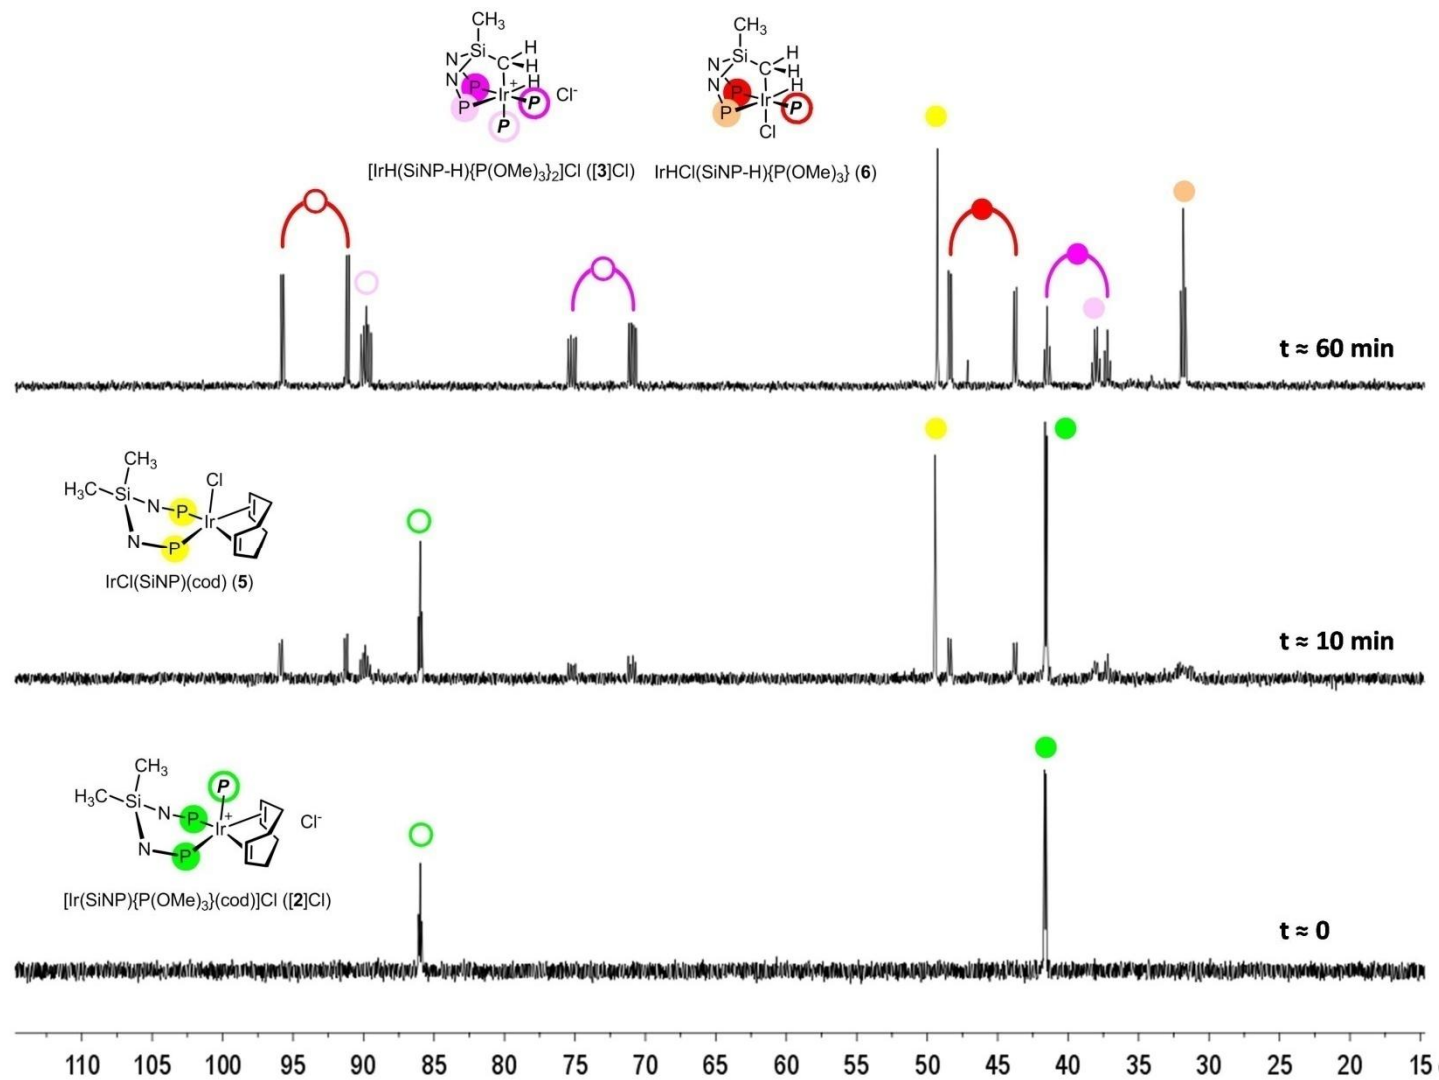

Figure S5. Full view of the  $^{31}\text{P}\{^1\text{H}\}$  NMR spectra at different times after adding  $\text{P}(\text{OMe})_3$  to  $\text{IrCl}(\text{SiNP})(\text{cod})$  ( $\mathbf{5}$ ) (1:1,  $\text{CDCl}_3$ , 298 K).

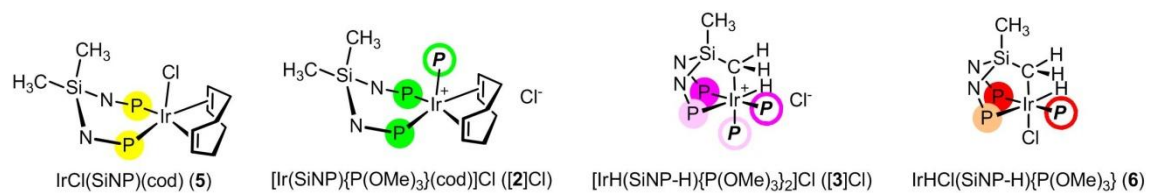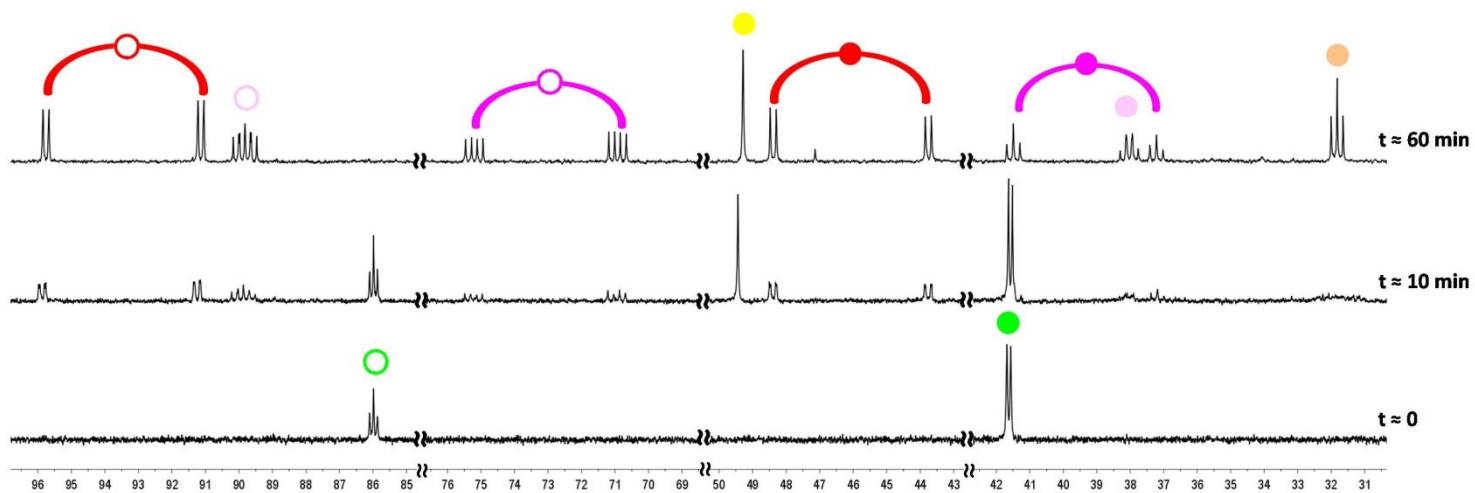

**Figure S6.** Selected regions of the  $^{31}\text{P}\{^1\text{H}\}$  NMR spectra at different times after adding  $\text{P}(\text{OMe})_3$  to  $\text{IrCl}(\text{SiNP})(\text{cod})$  (**5**) (1:1,  $\text{CDCl}_3$ , 298 K).

## 4. Atomic coordinates of calculated molecular structures

**[Ir(SiNP){P(OMe)<sub>3</sub>}(cod)]<sup>+</sup> (2<sup>+</sup>, SPY-5-13)**

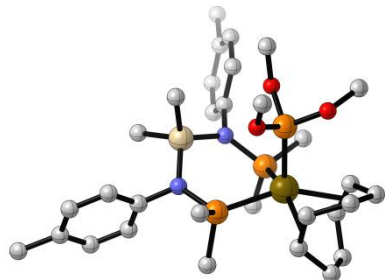

|    |             |             |             |
|----|-------------|-------------|-------------|
| Si | 0.12691200  | 1.82725100  | -1.71018500 |
| C  | -0.04662600 | 1.05598100  | -3.41672400 |
| H  | -0.97195900 | 1.38928900  | -3.89648100 |
| H  | 0.78702000  | 1.40499700  | -4.03709400 |
| H  | -0.03890800 | -0.03349600 | -3.40938500 |
| C  | 0.32806800  | 3.67731600  | -2.00508100 |
| H  | 1.18917200  | 3.86610300  | -2.65215800 |
| H  | -0.56284500 | 4.05461000  | -2.51658800 |
| H  | 0.46203100  | 4.26069600  | -1.09062100 |
| N  | -1.29482300 | 1.59975300  | -0.65319400 |
| N  | 1.57816700  | 1.21799600  | -0.86243800 |
| P  | -1.38415100 | 0.59583200  | 0.74623300  |
| P  | 1.77481800  | -0.29143800 | -0.03173400 |
| Ir | -0.22686200 | -1.50218700 | 0.56754600  |
| C  | -2.43553500 | 2.41843100  | -1.02701200 |
| C  | -3.25385000 | 2.01750900  | -2.09057200 |
| C  | -2.73188500 | 3.62198300  | -0.37199100 |
| C  | -4.33039400 | 2.80699300  | -2.49727200 |
| H  | -3.04690700 | 1.07307700  | -2.57920300 |
| C  | -3.81699600 | 4.39841500  | -0.77707700 |
| H  | -2.11761100 | 3.95238600  | 0.45718100  |
| C  | -4.63217800 | 4.01277100  | -1.85089400 |
| H  | -4.95116600 | 2.47287800  | -3.32484300 |
| H  | -4.02987200 | 5.32504800  | -0.24978500 |
| C  | 2.73647300  | 2.08993400  | -1.01581100 |
| C  | 3.54863200  | 2.03241900  | -2.15444400 |
| C  | 3.02612900  | 3.05358000  | -0.03858800 |
| C  | 4.62134500  | 2.91516700  | -2.30733900 |
| H  | 3.34631000  | 1.30049000  | -2.92657800 |
| C  | 4.09462000  | 3.93155900  | -0.19971800 |

|   |             |             |             |
|---|-------------|-------------|-------------|
| H | 2.41403000  | 3.10389900  | 0.85410200  |
| C | 4.91428500  | 3.88098200  | -1.33782000 |
| H | 5.23615800  | 2.84962500  | -3.20123200 |
| H | 4.29694100  | 4.66785400  | 0.57423500  |
| C | -5.78207300 | 4.87993500  | -2.30529000 |
| H | -5.43965600 | 5.65541400  | -3.00178500 |
| H | -6.54620400 | 4.29238400  | -2.82201600 |
| H | -6.25493100 | 5.39085700  | -1.46117700 |
| C | 6.06029500  | 4.84885400  | -1.51105800 |
| H | 6.71390800  | 4.55153700  | -2.33540500 |
| H | 5.69390300  | 5.86000600  | -1.72560200 |
| H | 6.66679200  | 4.91483700  | -0.60172900 |
| C | -3.20988100 | 0.44612900  | 1.04765400  |
| C | -3.88426100 | 1.20967900  | 2.01453100  |
| C | -3.96206300 | -0.43824300 | 0.25566300  |
| C | -5.26107600 | 1.06778400  | 2.20390300  |
| H | -3.34659600 | 1.92369700  | 2.62510600  |
| C | -5.33786300 | -0.57472600 | 0.44138000  |
| H | -3.47856700 | -1.00317100 | -0.53024700 |
| C | -5.99175600 | 0.17186400  | 1.42365100  |
| H | -5.75898600 | 1.66521300  | 2.96173200  |
| H | -5.89738400 | -1.26369400 | -0.18439200 |
| H | -7.06157000 | 0.06152900  | 1.57344000  |
| C | 2.93716900  | -1.28866200 | -1.09075500 |
| C | 3.89844600  | -2.15234200 | -0.53636500 |
| C | 2.81569900  | -1.24842800 | -2.48810500 |
| C | 4.71386600  | -2.93985200 | -1.35336900 |
| H | 4.03949600  | -2.20532700 | 0.53684200  |
| C | 3.63901300  | -2.02272000 | -3.30619200 |
| H | 2.07240700  | -0.61011000 | -2.94684700 |
| C | 4.59120100  | -2.87413400 | -2.74153500 |
| H | 5.45190200  | -3.59408000 | -0.89897100 |
| H | 3.53451100  | -1.95864900 | -4.38534900 |
| H | 5.23241500  | -3.47727800 | -3.37738300 |
| C | 2.87755200  | 0.15066600  | 1.40068300  |
| C | 4.24922400  | 0.41164400  | 1.23184400  |
| C | 2.32824000  | 0.26949300  | 2.68465400  |
| C | 5.04460000  | 0.76800300  | 2.32188800  |
| H | 4.70528500  | 0.33584800  | 0.25180300  |
| C | 3.12095100  | 0.63520700  | 3.77376600  |
| H | 1.27575500  | 0.06140300  | 2.82829200  |
| C | 4.48339600  | 0.88151500  | 3.59550200  |
| H | 6.10312700  | 0.95880000  | 2.17214400  |
| H | 2.67263300  | 0.72173800  | 4.75899600  |
| H | 5.10454000  | 1.15777800  | 4.44255100  |
| C | -0.83780700 | 1.70281600  | 2.14916400  |

|   |             |             |             |
|---|-------------|-------------|-------------|
| C | -1.04646400 | 1.36433100  | 3.50018800  |
| C | -0.15954200 | 2.89895600  | 1.87615300  |
| C | -0.59752800 | 2.19299800  | 4.52910500  |
| H | -1.58331000 | 0.46438300  | 3.76971300  |
| C | 0.29395500  | 3.72983100  | 2.90474500  |
| H | 0.01094400  | 3.19477300  | 0.85036700  |
| C | 0.07836700  | 3.37997200  | 4.23665200  |
| H | -0.78537400 | 1.91057000  | 5.56069900  |
| H | 0.81096100  | 4.65228200  | 2.65727800  |
| H | 0.42542000  | 4.02510900  | 5.03791800  |
| C | 1.25707800  | -2.72074900 | 1.75052100  |
| H | 2.23271900  | -2.25763000 | 1.67741400  |
| C | 0.83472500  | -3.47387700 | 0.62555500  |
| H | 1.52134700  | -3.52734000 | -0.21510700 |
| C | -1.27753900 | -1.91825400 | 2.50397300  |
| H | -1.98969700 | -1.13652900 | 2.74880700  |
| C | -1.74241900 | -2.82638300 | 1.51252500  |
| H | -2.73154600 | -2.59793600 | 1.12781300  |
| C | -0.09721700 | -4.66534700 | 0.76359500  |
| H | 0.43878600  | -5.48437200 | 1.26510700  |
| H | -0.34994000 | -5.02666500 | -0.23437200 |
| C | -1.39267700 | -4.31879800 | 1.52705200  |
| H | -1.32665800 | -4.65011600 | 2.56940300  |
| H | -2.22516600 | -4.88096500 | 1.09522300  |
| C | 0.86753300  | -3.06436500 | 3.18885000  |
| H | 1.71827100  | -2.84801500 | 3.84231200  |
| H | 0.69248800  | -4.14237600 | 3.26741400  |
| C | -0.35854700 | -2.27367500 | 3.65535300  |
| H | -0.03081800 | -1.34356400 | 4.12977700  |
| H | -0.92551700 | -2.82245500 | 4.42360900  |
| P | -1.02012000 | -2.24289300 | -1.55422300 |
| O | -1.83786200 | -3.67214900 | -1.63285400 |
| O | 0.19487400  | -2.63328100 | -2.55495700 |
| O | -2.02894600 | -1.25625400 | -2.39278700 |
| C | -3.25443900 | -3.84534100 | -1.46983000 |
| C | 0.16248700  | -3.54874100 | -3.67266400 |
| C | -2.51621200 | -1.54196700 | -3.72454500 |
| H | -3.50784400 | -3.99225200 | -0.41819000 |
| H | -3.81648100 | -2.99548600 | -1.86295100 |
| H | -3.52523600 | -4.74110800 | -2.03206700 |
| H | 1.19574300  | -3.85658900 | -3.83658700 |
| H | -0.45736700 | -4.41650500 | -3.44571400 |
| H | -0.21141500 | -3.04364600 | -4.56647800 |
| H | -3.49313200 | -1.06372700 | -3.81391200 |
| H | -1.83265800 | -1.11461100 | -4.46154700 |
| H | -2.62331400 | -2.61448000 | -3.89681600 |



**[Ir(SiNP){P(OMe)<sub>3</sub>}(cod)]<sup>+</sup> (2<sup>+</sup>, TBPY-5-13)**

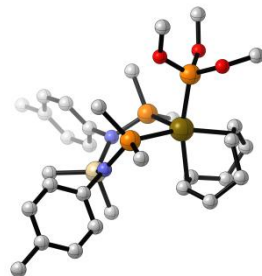

|    |             |             |             |
|----|-------------|-------------|-------------|
| Si | -0.29013600 | 2.43249900  | -1.15890600 |
| C  | -0.35118400 | 2.55677800  | -3.04222000 |
| H  | -1.26432400 | 3.08736600  | -3.33219000 |
| H  | 0.49629100  | 3.16133600  | -3.38451200 |
| H  | -0.33200700 | 1.61104900  | -3.58476600 |
| C  | -0.42348200 | 4.21883900  | -0.56615400 |
| H  | 0.39620100  | 4.81113700  | -0.98143900 |
| H  | -1.36092200 | 4.65146400  | -0.92484000 |
| H  | -0.39446600 | 4.32657100  | 0.52116500  |
| N  | -1.70978000 | 1.51709700  | -0.54066400 |
| N  | 1.27974700  | 1.78874500  | -0.56619900 |
| P  | -1.73842400 | 0.00640900  | 0.33252700  |
| P  | 1.76759800  | 0.13600500  | -0.27158200 |
| Ir | -0.00829200 | -1.51644200 | -0.60399000 |
| C  | -2.93790200 | 2.27333900  | -0.72684600 |
| C  | -3.69315000 | 2.10328100  | -1.89404300 |
| C  | -3.38821500 | 3.19583600  | 0.23023500  |
| C  | -4.86883900 | 2.82771300  | -2.09553800 |
| H  | -3.36556000 | 1.39058500  | -2.64404100 |
| C  | -4.56652300 | 3.91237000  | 0.02400400  |
| H  | -2.81986900 | 3.34333300  | 1.14110200  |
| C  | -5.32872100 | 3.74497000  | -1.14190000 |
| H  | -5.43882400 | 2.67196200  | -3.00782600 |
| H  | -4.89811500 | 4.61651100  | 0.78294500  |
| C  | 2.23336900  | 2.85932800  | -0.28333200 |
| C  | 2.99202600  | 3.45387200  | -1.29960300 |
| C  | 2.34806900  | 3.38160600  | 1.01437900  |
| C  | 3.84936100  | 4.52124300  | -1.02242300 |
| H  | 2.90240900  | 3.10459800  | -2.32012100 |
| C  | 3.20642800  | 4.44428400  | 1.28482600  |
| H  | 1.75808200  | 2.95280800  | 1.81569800  |
| C  | 3.98026600  | 5.03278500  | 0.27356400  |
| H  | 4.41914500  | 4.96504600  | -1.83470200 |
| H  | 3.26990300  | 4.82785000  | 2.30002900  |

|   |             |             |             |
|---|-------------|-------------|-------------|
| C | -6.58699000 | 4.54742200  | -1.37145300 |
| H | -6.35559400 | 5.52032200  | -1.82257700 |
| H | -7.27307000 | 4.02967000  | -2.04758800 |
| H | -7.11272400 | 4.74352700  | -0.43228900 |
| C | 4.92944900  | 6.16677900  | 0.57780300  |
| H | 5.88217500  | 5.78818000  | 0.96840200  |
| H | 5.15325000  | 6.75206900  | -0.31839200 |
| H | 4.51689500  | 6.84155500  | 1.33415300  |
| C | -3.45902500 | -0.70302900 | 0.22282700  |
| C | -3.58752900 | -2.06928600 | -0.06612400 |
| C | -4.62291800 | 0.01197300  | 0.56790800  |
| C | -4.83535600 | -2.70005900 | -0.04901700 |
| H | -2.69793100 | -2.64157400 | -0.29343900 |
| C | -5.86918500 | -0.61300800 | 0.57049600  |
| H | -4.56735500 | 1.05453600  | 0.85020700  |
| C | -5.98233300 | -1.97048200 | 0.25786500  |
| H | -4.90344900 | -3.76014900 | -0.27535500 |
| H | -6.75295600 | -0.03767400 | 0.83027000  |
| H | -6.95450200 | -2.45456000 | 0.26785000  |
| C | 3.16913600  | -0.24122300 | -1.42876300 |
| C | 4.03870300  | -1.29906700 | -1.10188500 |
| C | 3.34159000  | 0.40381900  | -2.66002300 |
| C | 5.06581700  | -1.67226300 | -1.96818500 |
| H | 3.91131700  | -1.83592000 | -0.16725000 |
| C | 4.36567200  | 0.02450300  | -3.53340500 |
| H | 2.67113400  | 1.20187500  | -2.95360300 |
| C | 5.23503700  | -1.00979900 | -3.18782300 |
| H | 5.73219400  | -2.48402100 | -1.69131600 |
| H | 4.48059600  | 0.54292700  | -4.48072900 |
| H | 6.03500600  | -1.30083400 | -3.86189900 |
| C | 2.68800000  | 0.29622400  | 1.33764300  |
| C | 4.06425400  | 0.57416600  | 1.39253100  |
| C | 1.97423000  | 0.24367400  | 2.54337900  |
| C | 4.70729500  | 0.76716000  | 2.61664900  |
| H | 4.64497600  | 0.65227500  | 0.48197900  |
| C | 2.61355200  | 0.44830000  | 3.76812100  |
| H | 0.91264000  | 0.04295700  | 2.53770000  |
| C | 3.98559400  | 0.70462900  | 3.80958400  |
| H | 5.77269200  | 0.97741300  | 2.63280900  |
| H | 2.03560800  | 0.40767600  | 4.68681800  |
| H | 4.48593700  | 0.85858900  | 4.76114200  |
| C | -1.80067700 | 0.57666100  | 2.10933700  |
| C | -2.55279800 | -0.11529700 | 3.07307600  |
| C | -1.10770100 | 1.72779200  | 2.51102600  |
| C | -2.61544200 | 0.33762600  | 4.39199100  |
| H | -3.10478900 | -1.00624300 | 2.79628100  |
| C | -1.16636800 | 2.18177200  | 3.83124600  |
| H | -0.52667100 | 2.28780100  | 1.78851500  |
| C | -1.92268800 | 1.48818600  | 4.77674900  |
| H | -3.21548700 | -0.20542500 | 5.11656900  |

|   |             |             |             |
|---|-------------|-------------|-------------|
| H | -0.62717400 | 3.08118400  | 4.11363500  |
| H | -1.97802200 | 1.84351100  | 5.80135600  |
| C | -0.67380100 | -3.40149500 | -1.41535500 |
| H | -1.02824300 | -4.10342800 | -0.64037500 |
| C | 0.77143100  | -3.31686300 | -1.51889200 |
| H | 1.34726500  | -3.93541700 | -0.83210700 |
| C | -1.10962500 | -0.94299200 | -2.57861800 |
| H | -1.57248800 | 0.01846000  | -2.39179400 |
| C | 0.25786500  | -0.94011700 | -2.84561400 |
| H | 0.75237800  | 0.02165900  | -2.83989900 |
| C | 1.51044800  | -3.15862800 | -2.83487200 |
| H | 1.48824300  | -4.10460000 | -3.39746200 |
| H | 2.56054700  | -2.95979400 | -2.61097400 |
| C | 0.94710700  | -2.00897600 | -3.68357300 |
| H | 0.23018700  | -2.38514500 | -4.42087500 |
| H | 1.75244500  | -1.53532000 | -4.25108400 |
| C | -1.58035100 | -3.43731200 | -2.65332200 |
| H | -2.45323300 | -4.06737000 | -2.45452900 |
| H | -1.05446900 | -3.91796600 | -3.48654200 |
| C | -2.05478800 | -2.02924800 | -3.04499900 |
| H | -3.03720000 | -1.83590500 | -2.60959800 |
| H | -2.18005700 | -1.93566400 | -4.13432700 |
| P | 0.42469500  | -2.65559100 | 1.34803000  |
| O | 2.02650800  | -2.85761600 | 1.54467100  |
| C | 2.66130800  | -3.29165800 | 2.76994100  |
| H | 3.65547200  | -3.64157000 | 2.49075800  |
| H | 2.74667800  | -2.44465800 | 3.45348100  |
| H | 2.11231400  | -4.10819900 | 3.24447200  |
| O | -0.18863400 | -2.01640500 | 2.69428200  |
| C | -0.36702900 | -2.68984600 | 3.96276000  |
| H | 0.53103500  | -2.57047300 | 4.57179000  |
| H | -1.20690300 | -2.19452500 | 4.44859600  |
| H | -0.59057900 | -3.74662200 | 3.81294000  |
| O | -0.17127800 | -4.16866700 | 1.48686100  |
| C | 0.51191300  | -5.41399300 | 1.23976200  |
| H | 0.35671100  | -6.05050400 | 2.11358500  |
| H | 0.07429900  | -5.88590700 | 0.35766900  |
| H | 1.58100400  | -5.26275100 | 1.08300700  |

**[IrH(SiNP-H){P(OMe)<sub>3</sub>}<sub>2</sub>]<sup>+</sup> (3<sup>+</sup>)**

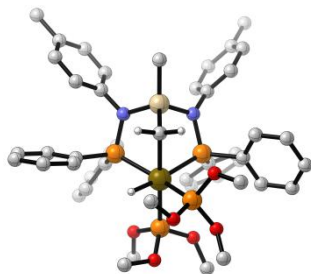

|   |             |             |             |
|---|-------------|-------------|-------------|
| C | -0.04025500 | -0.30522700 | -2.31437500 |
| H | 0.39499700  | -1.15154400 | -2.85511400 |
| H | -0.79874200 | 0.14876700  | -2.95349100 |
| C | 2.32962000  | 1.77521800  | -3.04198600 |
| H | 1.70038300  | 2.36550700  | -3.71548900 |
| H | 2.88548300  | 1.04959700  | -3.64334600 |
| H | 3.05344900  | 2.45016900  | -2.57774700 |
| C | -1.32785200 | -2.54174900 | 4.02609400  |
| H | -1.77696700 | -1.66758100 | 4.50536000  |
| H | -0.43128300 | -2.83396800 | 4.57339700  |
| H | -2.04290400 | -3.36976400 | 4.01495700  |
| C | -2.48544200 | -4.26528900 | 0.93412700  |
| H | -2.20463500 | -4.20979500 | -0.12034500 |
| H | -3.31663100 | -4.96138600 | 1.05606200  |
| H | -1.63191700 | -4.60944400 | 1.52613600  |
| C | -4.15294400 | -0.94366700 | 2.91939400  |
| H | -4.97886300 | -0.74325800 | 2.23355100  |
| H | -4.20824000 | -0.26291100 | 3.77126800  |
| H | -4.21058900 | -1.97786300 | 3.26068200  |
| C | -4.33289100 | 0.12472900  | -3.42610600 |
| H | -4.74650300 | -0.82601200 | -3.77552300 |
| H | -4.10824800 | 0.76096900  | -4.28226200 |
| H | -5.04416800 | 0.63308500  | -2.77136500 |
| C | -5.48683600 | -1.60071100 | -0.64695000 |
| H | -5.79798800 | -1.76049300 | -1.68036900 |
| H | -6.23749400 | -1.00491900 | -0.12548100 |
| H | -5.35911300 | -2.56360700 | -0.14879800 |
| C | -2.55803900 | -3.11998700 | -3.16014600 |
| H | -2.44582500 | -2.42241200 | -3.99508500 |
| H | -3.10128700 | -4.00591000 | -3.49172900 |
| H | -1.57012200 | -3.41034400 | -2.79151700 |
| C | 0.92257600  | 3.41865600  | -0.59988600 |
| C | 0.65410400  | 4.46064200  | -1.49675900 |
| H | 0.00184300  | 4.28433700  | -2.34426100 |

|   |             |             |             |
|---|-------------|-------------|-------------|
| C | 1.23150700  | 5.71816500  | -1.32074800 |
| H | 1.01173200  | 6.50603000  | -2.03665500 |
| C | 2.09197500  | 5.98257000  | -0.24766400 |
| C | 2.35905900  | 4.93548800  | 0.64452800  |
| H | 3.02675600  | 5.10628900  | 1.48528600  |
| C | 1.78647300  | 3.67624800  | 0.47454900  |
| H | 1.99712900  | 2.88480900  | 1.18533600  |
| C | 2.69292900  | 7.35297600  | -0.04652400 |
| H | 2.05089800  | 7.97640700  | 0.58805200  |
| H | 2.81831900  | 7.87908500  | -0.99713900 |
| H | 3.67078800  | 7.29439200  | 0.44028100  |
| C | -2.45129200 | 2.35516000  | -0.54065700 |
| C | -2.48411400 | 2.90186200  | -1.82980400 |
| H | -1.61161100 | 2.81979600  | -2.46713600 |
| C | -3.62965800 | 3.54691100  | -2.29993200 |
| H | -3.63194100 | 3.98495500  | -3.29404100 |
| C | -4.76495000 | 3.63558800  | -1.49247500 |
| H | -5.65302300 | 4.14627100  | -1.85330400 |
| C | -4.75221400 | 3.06708000  | -0.21629800 |
| H | -5.63252200 | 3.13089500  | 0.41684000  |
| C | -3.60464200 | 2.43058500  | 0.25745000  |
| H | -3.60315800 | 1.99929300  | 1.25304500  |
| C | -0.82673200 | 2.12476600  | 1.79161000  |
| C | -1.12673400 | 3.47389800  | 2.05640500  |
| H | -1.46682300 | 4.12389600  | 1.25793200  |
| C | -0.99326600 | 3.99113700  | 3.34379400  |
| H | -1.22954500 | 5.03444400  | 3.53031300  |
| C | -0.55546200 | 3.17208700  | 4.38712200  |
| H | -0.45364600 | 3.57572700  | 5.39034800  |
| C | -0.24973000 | 1.83491900  | 4.13469400  |
| H | 0.09863800  | 1.19201500  | 4.93755400  |
| C | -0.38574000 | 1.31409600  | 2.84588500  |
| H | -0.14357300 | 0.27389100  | 2.67126400  |
| C | 3.74782000  | -0.13937600 | -0.94342100 |
| C | 4.55617900  | 0.83392300  | -0.34065000 |
| H | 4.10525300  | 1.58514700  | 0.29848900  |
| C | 5.92818400  | 0.87162700  | -0.58565400 |
| H | 6.52974700  | 1.64343100  | -0.11218200 |
| C | 6.54321000  | -0.05955300 | -1.43262000 |
| C | 5.72619700  | -1.01627900 | -2.04821900 |
| H | 6.16851600  | -1.73688000 | -2.73140300 |
| C | 4.35163200  | -1.05507700 | -1.81753400 |
| H | 3.74098100  | -1.79269200 | -2.32600200 |
| C | 8.03481400  | -0.03792800 | -1.66490600 |
| H | 8.42991500  | 0.98189300  | -1.63922400 |
| H | 8.29614400  | -0.47917700 | -2.63092200 |
| H | 8.56277900  | -0.60974100 | -0.89164900 |
| C | 2.11072700  | -2.97019000 | -0.44136900 |
| C | 1.51936500  | -3.64450500 | -1.52164300 |
| H | 0.61864100  | -3.24627000 | -1.97170400 |

|    |             |             |             |
|----|-------------|-------------|-------------|
| C  | 2.07811800  | -4.81715500 | -2.03100900 |
| H  | 1.60139400  | -5.32173900 | -2.86639900 |
| C  | 3.24374400  | -5.34031600 | -1.46897800 |
| H  | 3.67624800  | -6.25637300 | -1.86010000 |
| C  | 3.85304900  | -4.67323200 | -0.40634000 |
| H  | 4.76732400  | -5.06290900 | 0.03108000  |
| C  | 3.29927300  | -3.49523900 | 0.09671600  |
| H  | 3.80371000  | -2.98567900 | 0.90840200  |
| C  | 2.08922400  | -1.24847000 | 1.85987000  |
| C  | 2.63141500  | -0.05619300 | 2.35439000  |
| H  | 2.67920700  | 0.81198400  | 1.71088900  |
| C  | 3.11669000  | 0.02195000  | 3.66175700  |
| H  | 3.54044900  | 0.95421700  | 4.02266600  |
| C  | 3.06385700  | -1.09458200 | 4.49473700  |
| H  | 3.45159000  | -1.04008500 | 5.50768100  |
| C  | 2.51692300  | -2.28872400 | 4.01580200  |
| H  | 2.48294400  | -3.16679700 | 4.65457600  |
| C  | 2.02933400  | -2.36490500 | 2.71194800  |
| H  | 1.61234200  | -3.29975500 | 2.35533700  |
| N  | 0.38178100  | 2.09598300  | -0.80848700 |
| N  | 2.31464100  | -0.12917700 | -0.74778800 |
| O  | -0.89432700 | -2.21436800 | 2.69343900  |
| O  | -2.95545300 | -2.98780800 | 1.39798800  |
| O  | -2.91293200 | -0.66265000 | 2.24270400  |
| O  | -3.08406600 | -0.07857800 | -2.73612300 |
| O  | -4.25776000 | -0.84771300 | -0.56283900 |
| O  | -3.33752300 | -2.53798700 | -2.10289800 |
| Si | 1.26440500  | 0.88818400  | -1.78385100 |
| P  | -0.95469000 | 1.46362600  | 0.07488900  |
| P  | 1.45258100  | -1.32847400 | 0.12918500  |
| P  | -1.91917200 | -1.71937400 | 1.52852600  |
| P  | -2.94110500 | -1.08023400 | -1.47162300 |
| Ir | -0.90843300 | -0.95582100 | -0.40287000 |
| H  | -0.79044400 | -2.47389600 | -0.89034300 |

**[Ir(SiNP){P(OMe)<sub>3</sub>}<sub>2</sub>]<sup>+</sup> (4<sup>+</sup>)**

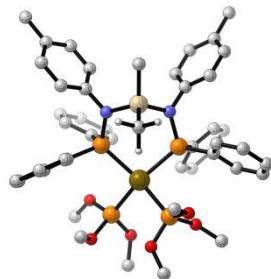

|    |             |             |             |
|----|-------------|-------------|-------------|
| Si | 1.61857500  | 1.24640800  | -1.81952000 |
| C  | 0.59533900  | 0.60082300  | -3.26433500 |
| H  | 0.19811300  | 1.40846900  | -3.88706700 |
| H  | 1.24045200  | -0.01071900 | -3.90556000 |
| H  | -0.23930000 | -0.02199700 | -2.92783500 |
| C  | 3.00893500  | 2.30700800  | -2.48898700 |
| H  | 3.62420000  | 1.72061500  | -3.17841200 |
| H  | 2.59321700  | 3.15473300  | -3.04319000 |
| H  | 3.66215300  | 2.70339200  | -1.70959500 |
| N  | 0.63902000  | 2.22568400  | -0.69925300 |
| N  | 2.30035400  | -0.14470700 | -0.95227200 |
| P  | -0.86050700 | 1.64208000  | -0.08330000 |
| P  | 1.31902200  | -1.22608100 | -0.03083700 |
| Ir | -1.05424000 | -0.74119300 | -0.07550600 |
| C  | 1.18839700  | 3.50014300  | -0.28420000 |
| C  | 0.87038000  | 4.68654700  | -0.95687800 |
| C  | 2.07979500  | 3.55518900  | 0.79509800  |
| C  | 1.43007500  | 5.89819300  | -0.54957200 |
| H  | 0.17688900  | 4.66106900  | -1.79007900 |
| C  | 2.64104000  | 4.76913100  | 1.18862200  |
| H  | 2.31104600  | 2.64303000  | 1.33618500  |
| C  | 2.32868600  | 5.96334600  | 0.52430800  |
| H  | 1.16677800  | 6.80900100  | -1.08136600 |
| H  | 3.32787200  | 4.78984900  | 2.03083900  |
| C  | 3.74330100  | -0.29324600 | -0.95363600 |
| C  | 4.38732800  | -1.11880800 | -1.88420800 |
| C  | 4.52815800  | 0.42976300  | -0.04520400 |
| C  | 5.77901600  | -1.22042300 | -1.89574500 |
| H  | 3.79883500  | -1.68441900 | -2.59715200 |
| C  | 5.91777400  | 0.32863200  | -0.06932200 |
| H  | 4.04247800  | 1.06937000  | 0.68395800  |
| C  | 6.57098900  | -0.49799300 | -0.99357400 |
| H  | 6.25638700  | -1.86975900 | -2.62529200 |
| H  | 6.50444400  | 0.89956800  | 0.64579700  |

|   |             |             |             |
|---|-------------|-------------|-------------|
| C | 2.95849900  | 7.27276700  | 0.93465400  |
| H | 3.87509100  | 7.46434600  | 0.36323300  |
| H | 2.28428400  | 8.11551800  | 0.75642200  |
| H | 3.23036700  | 7.27253700  | 1.99402400  |
| C | 8.07780900  | -0.58424000 | -1.03530700 |
| H | 8.41453100  | -1.57662900 | -1.34908400 |
| H | 8.49377100  | 0.13946800  | -1.74707900 |
| H | 8.51892700  | -0.36839100 | -0.05803600 |
| C | -2.12254100 | 2.71418800  | -0.92736200 |
| C | -3.25014700 | 3.19955900  | -0.24909600 |
| C | -1.97236500 | 3.03199700  | -2.28594000 |
| C | -4.19741400 | 3.98342100  | -0.91244700 |
| H | -3.38885200 | 2.97585300  | 0.80212700  |
| C | -2.91835800 | 3.81324900  | -2.94940300 |
| H | -1.09941800 | 2.68528900  | -2.82505300 |
| C | -4.03679000 | 4.29154800  | -2.26329900 |
| H | -5.05532200 | 4.36452900  | -0.36581900 |
| H | -2.77574700 | 4.05828400  | -3.99813400 |
| H | -4.77011500 | 4.90731800  | -2.77539700 |
| C | 1.61812900  | -2.86990200 | -0.84053500 |
| C | 1.92048500  | -4.04367200 | -0.13528900 |
| C | 1.48682900  | -2.94504600 | -2.23798700 |
| C | 2.11240400  | -5.25185000 | -0.81203500 |
| H | 2.00902100  | -4.01979400 | 0.94282000  |
| C | 1.67389800  | -4.15079900 | -2.91286900 |
| H | 1.24987700  | -2.05146600 | -2.80406100 |
| C | 1.99431000  | -5.30989800 | -2.20082900 |
| H | 2.36126900  | -6.14650400 | -0.24869800 |
| H | 1.57665000  | -4.18409600 | -3.99422300 |
| H | 2.15071900  | -6.24808200 | -2.72478400 |
| C | 2.16182600  | -1.31106000 | 1.60439800  |
| C | 3.39857600  | -1.95269600 | 1.78974700  |
| C | 1.58704400  | -0.63010800 | 2.68709500  |
| C | 4.02943200  | -1.92452700 | 3.03467000  |
| H | 3.87958600  | -2.47104700 | 0.96841100  |
| C | 2.22407200  | -0.59404500 | 3.92749800  |
| H | 0.63362200  | -0.13236600 | 2.56247100  |
| C | 3.44533000  | -1.24619200 | 4.10573100  |
| H | 4.98312900  | -2.42800400 | 3.16225000  |
| H | 1.76098100  | -0.06070200 | 4.75249600  |
| H | 3.94058200  | -1.22455800 | 5.07209400  |
| C | -1.06183300 | 2.19535800  | 1.67299400  |
| C | -0.93201100 | 3.54397900  | 2.05369900  |
| C | -1.46106300 | 1.25961800  | 2.64175700  |
| C | -1.14995900 | 3.92890000  | 3.37639400  |
| H | -0.67626400 | 4.30149300  | 1.32360100  |
| C | -1.68651100 | 1.65051800  | 3.96340100  |
| H | -1.61506000 | 0.22496900  | 2.34729900  |
| C | -1.52142200 | 2.98446000  | 4.33578700  |
| H | -1.03732900 | 4.97269000  | 3.65384300  |

|   |             |             |             |
|---|-------------|-------------|-------------|
| H | -1.99931200 | 0.91136600  | 4.69501300  |
| H | -1.69518900 | 3.29106700  | 5.36315500  |
| P | -1.49018800 | -2.73917900 | 0.95308100  |
| P | -3.26907300 | -0.60795300 | -0.58737600 |
| O | -4.19635700 | 0.16539400  | 0.48733900  |
| O | -3.90586200 | -2.10531300 | -0.79814200 |
| O | -3.75455100 | 0.16035600  | -1.94343400 |
| O | -2.71472800 | -2.56306800 | 2.01382800  |
| O | -0.25474500 | -3.16262200 | 1.92210000  |
| O | -1.92353300 | -4.14462100 | 0.25143500  |
| C | -0.37041500 | -4.21483900 | 2.89651300  |
| H | 0.61640900  | -4.32617700 | 3.34741600  |
| H | -1.09242400 | -3.93774100 | 3.66924500  |
| H | -0.66874400 | -5.15272900 | 2.41940300  |
| C | -3.77277000 | -3.51174900 | 2.23027000  |
| H | -4.50548500 | -3.00421200 | 2.85952300  |
| H | -4.22831600 | -3.80579600 | 1.28364000  |
| H | -3.40498200 | -4.40356900 | 2.74578400  |
| C | -1.69751200 | -4.42729300 | -1.13999800 |
| H | -0.77302300 | -4.99652400 | -1.25449700 |
| H | -2.54507100 | -5.02327400 | -1.48454500 |
| H | -1.63795200 | -3.50367500 | -1.72011600 |
| C | -5.27094700 | -2.34501800 | -1.18736500 |
| H | -5.64822100 | -1.55156500 | -1.83751100 |
| H | -5.28619500 | -3.29386800 | -1.72691500 |
| H | -5.90361000 | -2.42568400 | -0.29870500 |
| C | -5.52744800 | 0.67841200  | 0.26617400  |
| H | -5.58620900 | 1.20603000  | -0.68640000 |
| H | -6.26051800 | -0.13160900 | 0.30025400  |
| H | -5.72212800 | 1.36977200  | 1.08674200  |
| C | -3.33009200 | -0.26880400 | -3.24661700 |
| H | -3.98907900 | -1.05912600 | -3.61961700 |
| H | -3.39769400 | 0.60257000  | -3.89869600 |
| H | -2.29946400 | -0.63404400 | -3.23637300 |

TS\_4<sup>+</sup>\_3<sup>+</sup>

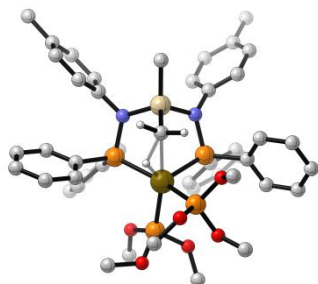

|   |             |             |             |
|---|-------------|-------------|-------------|
| P | -1.12909400 | 1.43537000  | 0.15163100  |
| P | 1.52821400  | -1.18306700 | 0.12451200  |
| N | 0.13343100  | 2.18533400  | -0.77340900 |
| N | 2.27044000  | 0.10507400  | -0.76099000 |
| C | -1.01806900 | 2.11484300  | 1.86167400  |
| C | -0.65951800 | 1.28417800  | 2.93084400  |
| H | -0.43795600 | 0.24021600  | 2.74947700  |
| C | -0.58097700 | 1.79234000  | 4.23008600  |
| H | -0.30065200 | 1.13509900  | 5.04796300  |
| C | -0.86030300 | 3.13621600  | 4.47471600  |
| H | -0.80352400 | 3.53047500  | 5.48522700  |
| C | -1.21844000 | 3.97482100  | 3.41559700  |
| H | -1.43763900 | 5.02242500  | 3.59915300  |
| C | -1.30063400 | 3.46992500  | 2.11954300  |
| H | -1.59077800 | 4.13052800  | 1.31001200  |
| C | -2.70737200 | 2.20510100  | -0.42410500 |
| C | -2.85725100 | 2.66450000  | -1.73986300 |
| H | -2.01633500 | 2.61807700  | -2.42268200 |
| C | -4.07818200 | 3.17387200  | -2.18406700 |
| H | -4.16896300 | 3.54748500  | -3.20027800 |
| C | -5.17812200 | 3.20798100  | -1.32491600 |
| H | -6.12700600 | 3.61035900  | -1.66736400 |
| C | -5.04886600 | 2.72641600  | -0.02014700 |
| H | -5.89821800 | 2.75135900  | 0.65658700  |
| C | -3.82388800 | 2.23001500  | 0.42820700  |
| H | -3.73640000 | 1.87154500  | 1.44883400  |
| C | 2.30463600  | -2.74112100 | -0.51037300 |
| C | 1.57126200  | -3.62218800 | -1.31872000 |
| H | 0.52469900  | -3.40404500 | -1.50872900 |
| C | 2.16630500  | -4.76326900 | -1.86083800 |
| H | 1.58049200  | -5.43418600 | -2.48271600 |
| C | 3.50810100  | -5.04238100 | -1.59986400 |
| H | 3.97252900  | -5.93132300 | -2.01634800 |
| C | 4.25164900  | -4.17316900 | -0.79895000 |

|    |             |             |             |
|----|-------------|-------------|-------------|
| H  | 5.29748800  | -4.38097800 | -0.59368300 |
| C  | 3.65946600  | -3.03067500 | -0.26079000 |
| H  | 4.25694900  | -2.36897200 | 0.35571700  |
| C  | 2.23047700  | -1.05314500 | 1.82631000  |
| C  | 2.57157900  | -2.18746800 | 2.58018600  |
| H  | 2.43937600  | -3.17919200 | 2.16354300  |
| C  | 3.09123700  | -2.05396200 | 3.86815800  |
| H  | 3.36618200  | -2.94179700 | 4.43039500  |
| C  | 3.26859000  | -0.78637600 | 4.42819800  |
| H  | 3.67994500  | -0.68403300 | 5.42801200  |
| C  | 2.91707300  | 0.34642600  | 3.69404500  |
| H  | 3.04282300  | 1.33665300  | 4.12131900  |
| C  | 2.40110600  | 0.21166400  | 2.40395200  |
| H  | 2.12553700  | 1.09713400  | 1.84408100  |
| C  | 0.54768200  | 3.55883400  | -0.58956800 |
| C  | 1.60592700  | 3.86229400  | 0.27830500  |
| H  | 2.08873400  | 3.05983400  | 0.82563700  |
| C  | 2.04469500  | 5.17526500  | 0.44067400  |
| H  | 2.87234100  | 5.38001300  | 1.11500800  |
| C  | 1.43669500  | 6.23400600  | -0.24616900 |
| C  | 0.38150100  | 5.92418700  | -1.11418200 |
| H  | -0.10217300 | 6.72167200  | -1.67259800 |
| C  | -0.05541600 | 4.61143300  | -1.29115000 |
| H  | -0.86580800 | 4.40534100  | -1.97882100 |
| C  | 1.88847700  | 7.66030800  | -0.04377400 |
| H  | 1.74721400  | 8.25734100  | -0.94935400 |
| H  | 2.94490600  | 7.71042800  | 0.23493100  |
| H  | 1.31690900  | 8.14541200  | 0.75720900  |
| C  | 3.69384000  | 0.17533100  | -1.00454900 |
| C  | 4.25235400  | -0.46502700 | -2.12083500 |
| H  | 3.61251200  | -1.05203900 | -2.77257300 |
| C  | 5.61537000  | -0.36485700 | -2.39198000 |
| H  | 6.02253200  | -0.87111800 | -3.26347100 |
| C  | 6.46906900  | 0.37307100  | -1.56052100 |
| C  | 5.90535300  | 1.00581300  | -0.44517200 |
| H  | 6.54183800  | 1.58481700  | 0.21908100  |
| C  | 4.54056500  | 0.91483100  | -0.16986500 |
| H  | 4.13147400  | 1.41871000  | 0.69724500  |
| C  | 7.94023400  | 0.50494100  | -1.87314400 |
| H  | 8.53288000  | 0.64180100  | -0.96413100 |
| H  | 8.12907200  | 1.37185700  | -2.51830100 |
| H  | 8.31945200  | -0.37723000 | -2.39701500 |
| C  | 0.01932000  | -0.22817900 | -2.46507400 |
| H  | 0.64112300  | -0.83580400 | -3.13711400 |
| H  | -0.83950400 | 0.13571000  | -3.02489200 |
| C  | 2.10059200  | 2.10167700  | -2.97311700 |
| H  | 1.41393600  | 2.72902300  | -3.55019600 |
| H  | 2.64966500  | 1.46002100  | -3.66727500 |
| H  | 2.82361000  | 2.76141600  | -2.48550300 |
| Ir | -0.82750400 | -0.95108100 | -0.38598200 |

|    |             |             |             |
|----|-------------|-------------|-------------|
| H  | -0.28562600 | -1.44980000 | -1.90412400 |
| P  | -2.84251200 | -1.30583500 | -1.44607400 |
| O  | -3.14471800 | -0.20896600 | -2.59719200 |
| O  | -3.05999300 | -2.62658300 | -2.39301400 |
| O  | -4.13762500 | -1.32359000 | -0.46480500 |
| C  | -3.81190900 | -0.44003900 | -3.85435700 |
| H  | -3.89054900 | 0.53981200  | -4.32701000 |
| H  | -3.22691200 | -1.11670600 | -4.48000800 |
| H  | -4.81118800 | -0.85581600 | -3.71043200 |
| C  | -2.90563800 | -3.96742500 | -1.91054000 |
| H  | -3.26931700 | -4.62158500 | -2.70474300 |
| H  | -1.85216000 | -4.18139000 | -1.71382800 |
| H  | -3.48842800 | -4.13035400 | -1.00019300 |
| C  | -5.48841700 | -1.30256100 | -0.96763200 |
| H  | -5.64471800 | -2.09059100 | -1.71017800 |
| H  | -6.13938700 | -1.47705600 | -0.11023400 |
| H  | -5.70990200 | -0.32276100 | -1.39801000 |
| P  | -1.56438400 | -2.07905200 | 1.42703000  |
| O  | -2.82287900 | -1.37754300 | 2.17036100  |
| O  | -2.17676400 | -3.60902500 | 1.33016300  |
| O  | -0.43767700 | -2.22847400 | 2.59496500  |
| C  | -3.97904500 | -2.04791200 | 2.70188900  |
| H  | -4.56337400 | -1.27654800 | 3.20589900  |
| H  | -4.56376800 | -2.48750000 | 1.89233600  |
| H  | -3.70409200 | -2.82703600 | 3.41677700  |
| C  | -1.29592200 | -4.72068200 | 1.10987100  |
| H  | -0.71005600 | -4.93501300 | 2.00866600  |
| H  | -1.92755300 | -5.57997600 | 0.87863900  |
| H  | -0.61230600 | -4.53178900 | 0.27728300  |
| C  | -0.77224900 | -2.60969400 | 3.94115300  |
| H  | 0.17133800  | -2.64915900 | 4.48621800  |
| H  | -1.43151800 | -1.86450200 | 4.39414900  |
| H  | -1.25385500 | -3.59231500 | 3.96689300  |
| Si | 1.13936200  | 1.08412300  | -1.72987600 |

**[Ir(SiNP)(CO)(cod)]<sup>+</sup>**

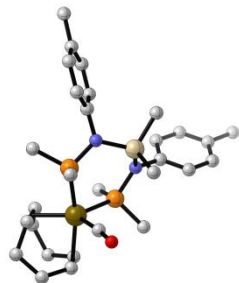

|    |             |             |             |
|----|-------------|-------------|-------------|
| Si | -0.34007000 | 1.76906900  | -1.60016500 |
| C  | -0.32744600 | 0.90613600  | -3.27081600 |
| H  | -1.32864200 | 0.99443800  | -3.70696000 |
| H  | 0.36827500  | 1.41499100  | -3.94611000 |
| H  | -0.06776100 | -0.15079800 | -3.25605300 |
| C  | -0.59980800 | 3.59469300  | -1.94388400 |
| H  | 0.29954100  | 4.00636700  | -2.41315200 |
| H  | -1.42845000 | 3.70849600  | -2.64942400 |
| H  | -0.82355400 | 4.18724400  | -1.05579100 |
| N  | -1.66277700 | 1.18284600  | -0.55599200 |
| N  | 1.21498200  | 1.56098600  | -0.72209200 |
| P  | -1.71436100 | -0.39208600 | 0.15750400  |
| P  | 1.89599600  | 0.01945900  | -0.37570800 |
| Ir | 0.35094700  | -1.76192500 | 0.01027700  |
| C  | -2.88345000 | 1.96923900  | -0.61969100 |
| C  | -3.72737000 | 1.88828400  | -1.73718900 |
| C  | -3.21730200 | 2.86244100  | 0.40644100  |
| C  | -4.86933500 | 2.68355300  | -1.82440600 |
| H  | -3.49273500 | 1.19137600  | -2.53520500 |
| C  | -4.36845000 | 3.64613500  | 0.31608100  |
| H  | -2.57567500 | 2.94675500  | 1.27521100  |
| C  | -5.21327000 | 3.57663500  | -0.79994100 |
| H  | -5.50643800 | 2.60204200  | -2.70132500 |
| H  | -4.60770600 | 4.32969100  | 1.12671600  |
| C  | 1.86971000  | 2.77556200  | -0.26137700 |
| C  | 3.11259000  | 3.18827600  | -0.75579800 |
| C  | 1.23897300  | 3.57845100  | 0.69981800  |
| C  | 3.70025900  | 4.36964800  | -0.29944300 |
| H  | 3.63531800  | 2.58883400  | -1.49081900 |
| C  | 1.82427200  | 4.76423600  | 1.13794400  |
| H  | 0.28112000  | 3.27237800  | 1.10686500  |
| C  | 3.06845400  | 5.18519900  | 0.64714500  |
| H  | 4.66898000  | 4.66196600  | -0.69618000 |

|   |             |             |             |
|---|-------------|-------------|-------------|
| H | 1.30866600  | 5.36572400  | 1.88214900  |
| C | -6.43763500 | 4.45385100  | -0.90861800 |
| H | -6.20915300 | 5.38313000  | -1.44514600 |
| H | -7.24091100 | 3.95316600  | -1.45712500 |
| H | -6.81795500 | 4.73283800  | 0.07811400  |
| C | 3.69138300  | 6.48070700  | 1.10892800  |
| H | 4.77400800  | 6.48072100  | 0.95522100  |
| H | 3.28154300  | 7.33421500  | 0.55479100  |
| H | 3.49567300  | 6.66174800  | 2.17024600  |
| C | -3.21635500 | -1.17192000 | -0.59793300 |
| C | -4.52110700 | -0.83770700 | -0.19218200 |
| C | -3.06106900 | -2.04280000 | -1.68895500 |
| C | -5.63029000 | -1.38439100 | -0.83911900 |
| H | -4.67982500 | -0.14507600 | 0.62570300  |
| C | -4.17027100 | -2.58299100 | -2.34159800 |
| H | -2.06857800 | -2.29773700 | -2.03960600 |
| C | -5.45890800 | -2.26024000 | -1.91263700 |
| H | -6.62865700 | -1.11761100 | -0.50587400 |
| H | -4.02454900 | -3.25545600 | -3.18145900 |
| H | -6.32351100 | -2.68418700 | -2.41439300 |
| C | 2.97497600  | -0.42708000 | -1.81250500 |
| C | 3.64188700  | -1.66588700 | -1.83568200 |
| C | 3.11838900  | 0.43513600  | -2.90734300 |
| C | 4.45462400  | -2.01278100 | -2.91390700 |
| H | 3.52101200  | -2.36749000 | -1.01764100 |
| C | 3.92217200  | 0.07942400  | -3.99404900 |
| H | 2.59217000  | 1.38107200  | -2.92413800 |
| C | 4.59702300  | -1.14055000 | -3.99716400 |
| H | 4.97031600  | -2.96819600 | -2.91058200 |
| H | 4.01471200  | 0.75874900  | -4.83583400 |
| H | 5.22384600  | -1.41593200 | -4.83974300 |
| C | 3.08116400  | 0.37088200  | 0.99416700  |
| C | 4.45421000  | 0.10910500  | 0.87159700  |
| C | 2.60380900  | 0.93539200  | 2.19073000  |
| C | 5.32577900  | 0.39382300  | 1.92604900  |
| H | 4.85575200  | -0.30700200 | -0.04408300 |
| C | 3.47705300  | 1.22527400  | 3.23727200  |
| H | 1.55036500  | 1.16269100  | 2.30534700  |
| C | 4.84122400  | 0.95095000  | 3.10901100  |
| H | 6.38498000  | 0.18418700  | 1.81351800  |
| H | 3.09073300  | 1.66552100  | 4.15124100  |
| H | 5.52079400  | 1.17471500  | 3.92563800  |
| C | -2.18552900 | -0.08613900 | 1.91671300  |
| C | -3.09975500 | -0.88428700 | 2.62221100  |
| C | -1.48596600 | 0.90871700  | 2.61952500  |
| C | -3.32200200 | -0.67468000 | 3.98661000  |
| H | -3.64739800 | -1.67330900 | 2.12001100  |
| C | -1.70631300 | 1.11794100  | 3.97992800  |
| H | -0.76575500 | 1.52551800  | 2.09319000  |
| C | -2.62963000 | 0.32596100  | 4.66888600  |

|   |             |             |             |
|---|-------------|-------------|-------------|
| H | -4.03947300 | -1.29789000 | 4.51187700  |
| H | -1.15860200 | 1.89792700  | 4.50020100  |
| H | -2.80481200 | 0.48736600  | 5.72810900  |
| C | 0.45516500  | -2.19432700 | -1.84519200 |
| O | 0.53315800  | -2.56330200 | -2.94253800 |
| C | -1.08171500 | -3.46132600 | 0.89956800  |
| H | -2.07936300 | -3.19257500 | 0.56941900  |
| C | -0.26553800 | -4.04607500 | -0.06487900 |
| H | -0.71698700 | -4.20649400 | -1.04062200 |
| C | 1.86528000  | -2.70378900 | 1.26668000  |
| H | 2.84529800  | -2.25172700 | 1.13849000  |
| C | 0.95527100  | -1.95062700 | 2.10089100  |
| H | 1.36001900  | -1.02834500 | 2.50432000  |
| C | 1.91168500  | -4.23743500 | 1.25246600  |
| C | -0.90239200 | -3.67116400 | 2.39611600  |
| C | -0.02423500 | -2.59877200 | 3.06364700  |
| H | 2.93709300  | -4.56205400 | 1.05144300  |
| H | 1.67110000  | -4.61415500 | 2.25293600  |
| H | -1.89358100 | -3.67994100 | 2.85817400  |
| H | -0.48303300 | -4.66951600 | 2.55455800  |
| H | 0.52154200  | -3.03043300 | 3.91590600  |
| H | -0.66360800 | -1.81732100 | 3.47951700  |
| C | 0.98345300  | -4.85789800 | 0.19671300  |
| H | 0.68304200  | -5.87893600 | 0.47589700  |
| H | 1.52165100  | -4.94812800 | -0.75156100 |

### IrCl(SiNP)(CO)

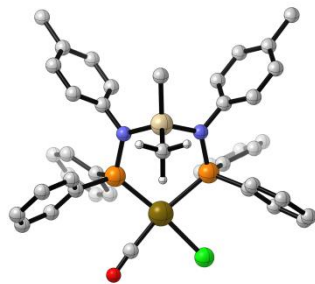

|    |             |             |             |
|----|-------------|-------------|-------------|
| Si | 0.15343800  | 1.12821400  | -1.82308600 |
| C  | 0.09024100  | -0.11439300 | -3.23395600 |
| H  | -0.72381400 | 0.12766800  | -3.92515800 |
| H  | 1.02362100  | -0.05268600 | -3.80472700 |
| H  | -0.04049700 | -1.14474200 | -2.89160300 |
| C  | 0.29694100  | 2.84931500  | -2.55514400 |
| H  | 1.19021900  | 2.90286700  | -3.18536300 |
| H  | -0.57399800 | 3.05326600  | -3.18583100 |
| H  | 0.36454600  | 3.63653700  | -1.80154600 |
| N  | -1.32491000 | 1.06834100  | -0.82076800 |
| N  | 1.59129600  | 0.83742700  | -0.80614800 |
| P  | -1.86022400 | -0.40113600 | -0.09799000 |
| P  | 1.74347400  | -0.58844100 | 0.14647600  |
| Ir | -0.25702700 | -2.01043300 | 0.13621200  |
| Cl | -2.01636500 | 2.31746500  | -0.58616600 |
| C  | -3.05544200 | 2.74156200  | -1.42428000 |
| C  | -1.63355000 | 3.14174400  | 0.48013500  |
| C  | -3.69841200 | 3.95855800  | -1.19120000 |
| H  | -3.36489300 | 2.11385800  | -2.25268200 |
| C  | -2.27622800 | 4.35919900  | 0.70164300  |
| H  | -0.84003100 | 2.81354200  | 1.14412900  |
| C  | -3.32047500 | 4.79114100  | -0.12854500 |
| H  | -4.50604500 | 4.26599000  | -1.85079300 |
| H  | -1.96423100 | 4.98048900  | 1.53731700  |
| C  | 2.63158900  | 1.84312600  | -0.78251900 |
| C  | 3.72613300  | 1.77864100  | -1.65349300 |
| C  | 2.54063300  | 2.92946100  | 0.10020300  |
| C  | 4.70551200  | 2.77457100  | -1.63408700 |
| H  | 3.81201700  | 0.94819700  | -2.34481300 |
| C  | 3.51853900  | 3.92190500  | 0.10848500  |
| H  | 1.69939400  | 2.98852000  | 0.78303300  |
| C  | 4.62081000  | 3.86364300  | -0.75771000 |
| H  | 5.54740000  | 2.70286500  | -2.31804300 |
| H  | 3.42566500  | 4.75387000  | 0.80223000  |

|   |             |             |             |
|---|-------------|-------------|-------------|
| C | -3.99797400 | 6.12177700  | 0.09903000  |
| H | -3.49222900 | 6.92163100  | -0.45619200 |
| H | -5.03905000 | 6.10268500  | -0.23614300 |
| H | -3.98334100 | 6.40180500  | 1.15635500  |
| C | 5.66625100  | 4.95383900  | -0.75725400 |
| H | 6.58247400  | 4.62896700  | -1.25779100 |
| H | 5.30459500  | 5.84821300  | -1.27942900 |
| H | 5.92361300  | 5.25977500  | 0.26185500  |
| C | -3.35342700 | -0.92048800 | -1.07340500 |
| C | -4.39334400 | -1.63544600 | -0.45646000 |
| C | -3.42832600 | -0.68471400 | -2.45365000 |
| C | -5.47899400 | -2.09785200 | -1.20247900 |
| H | -4.36398700 | -1.83126500 | 0.61036200  |
| C | -4.51621600 | -1.14299700 | -3.19921800 |
| H | -2.63979800 | -0.13345900 | -2.95030800 |
| C | -5.54472900 | -1.85208600 | -2.57553200 |
| H | -6.27510200 | -2.64592000 | -0.70716300 |
| H | -4.55851400 | -0.94307000 | -4.26590100 |
| H | -6.39163700 | -2.20864800 | -3.15426700 |
| C | 3.18615100  | -1.50168100 | -0.56277700 |
| C | 4.15371900  | -2.12592100 | 0.23871900  |
| C | 3.26065700  | -1.66498000 | -1.95544500 |
| C | 5.18643000  | -2.86632000 | -0.34148800 |
| H | 4.10612000  | -2.04447200 | 1.31786000  |
| C | 4.28979800  | -2.40796500 | -2.53446900 |
| H | 2.51333100  | -1.21008700 | -2.59462900 |
| C | 5.26004900  | -3.00743500 | -1.72777000 |
| H | 5.93055000  | -3.33563800 | 0.29531200  |
| H | 4.33209500  | -2.51695200 | -3.61419300 |
| H | 6.06367700  | -3.58378100 | -2.17657900 |
| C | 2.32780800  | -0.02805200 | 1.80050300  |
| C | 3.62543400  | 0.47186400  | 2.01460900  |
| C | 1.42883100  | -0.05178400 | 2.87661500  |
| C | 4.00899600  | 0.92348100  | 3.27739800  |
| H | 4.34012600  | 0.50804000  | 1.20037700  |
| C | 1.81281000  | 0.40312000  | 4.13967100  |
| H | 0.42403300  | -0.42411200 | 2.72317200  |
| C | 3.10514400  | 0.88882900  | 4.34260100  |
| H | 5.01496600  | 1.30375300  | 3.42775200  |
| H | 1.10256600  | 0.37400000  | 4.96054300  |
| H | 3.40832000  | 1.23932100  | 5.32483300  |
| C | -2.65407200 | 0.01304300  | 1.52729900  |
| C | -3.74397500 | 0.89734400  | 1.62958700  |
| C | -2.22533000 | -0.65560200 | 2.68426800  |
| C | -4.35170700 | 1.13382200  | 2.86245500  |
| H | -4.13019400 | 1.39732000  | 0.74939000  |
| C | -2.83720900 | -0.42187000 | 3.91846400  |
| H | -1.42670800 | -1.38667200 | 2.60366900  |
| C | -3.89632000 | 0.48104600  | 4.01135000  |
| H | -5.18808900 | 1.82391900  | 2.92302300  |

|    |             |             |             |
|----|-------------|-------------|-------------|
| H  | -2.48993900 | -0.95273500 | 4.79986100  |
| H  | -4.37500600 | 0.66551500  | 4.96867000  |
| Cl | 1.22803600  | -3.84566300 | 0.80022100  |
| C  | -1.53144200 | -3.33208500 | -0.12444400 |
| O  | -2.25287100 | -4.21767500 | -0.33170000 |

**IrHCl(SiNP-H)(CO)**

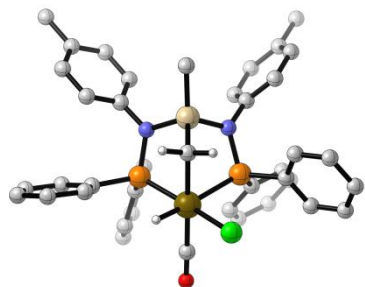

|   |             |             |             |
|---|-------------|-------------|-------------|
| C | 0.07114600  | -0.90403200 | -2.35166200 |
| H | 0.95820800  | -1.18511100 | -2.92768600 |
| H | -0.81211100 | -1.13073000 | -2.95551500 |
| C | 0.35521600  | 2.29089600  | -2.92685400 |
| H | -0.48115800 | 2.30434500  | -3.63286500 |
| H | 1.28232700  | 2.18751500  | -3.49924600 |
| H | 0.38034700  | 3.25367300  | -2.40968600 |
| C | -1.92232700 | 2.34975700  | -0.58445400 |
| C | -2.86716900 | 2.87280900  | -1.47753100 |
| H | -3.17900300 | 2.28294700  | -2.33195100 |
| C | -3.40049200 | 4.14778400  | -1.28078200 |
| H | -4.12722000 | 4.53281600  | -1.99182000 |
| C | -3.01249500 | 4.94159400  | -0.19317800 |
| C | -2.06481200 | 4.41329800  | 0.69493100  |
| H | -1.73910400 | 5.00592800  | 1.54625600  |
| C | -1.53015500 | 3.13928800  | 0.50717500  |
| H | -0.80996800 | 2.74231700  | 1.21485300  |
| C | -3.61113500 | 6.31036300  | 0.02972000  |
| H | -4.47366100 | 6.25874600  | 0.70587600  |
| H | -3.95922200 | 6.75207400  | -0.90838000 |
| H | -2.88682100 | 6.99432500  | 0.48229400  |
| C | -3.49400700 | -0.80112800 | -0.82386100 |
| C | -3.71398500 | -0.50659800 | -2.17724600 |
| H | -2.95661700 | 0.02363600  | -2.74374000 |
| C | -4.90024000 | -0.88908800 | -2.80578300 |
| H | -5.05738400 | -0.64416300 | -3.85220100 |
| C | -5.87893700 | -1.58425500 | -2.09252900 |
| H | -6.80256800 | -1.88131600 | -2.58051200 |
| C | -5.66241200 | -1.89869900 | -0.74904100 |
| H | -6.41619500 | -2.44292100 | -0.18757000 |
| C | -4.47823900 | -1.51226600 | -0.11898500 |
| H | -4.32899500 | -1.76183200 | 0.92654500  |
| C | -2.39757800 | 0.03499500  | 1.68296500  |
| C | -3.51892900 | 0.85417800  | 1.91657000  |

|    |             |             |             |
|----|-------------|-------------|-------------|
| H  | -4.09056900 | 1.24687400  | 1.08283700  |
| C  | -3.91420800 | 1.16044000  | 3.21753100  |
| H  | -4.78092200 | 1.79407500  | 3.38069200  |
| C  | -3.20211100 | 0.64922000  | 4.30656900  |
| H  | -3.51527100 | 0.88369800  | 5.31977400  |
| C  | -2.09235500 | -0.16664700 | 4.08756400  |
| H  | -1.53383500 | -0.56978600 | 4.92655700  |
| C  | -1.69159300 | -0.46969100 | 2.78358900  |
| H  | -0.82621200 | -1.10191900 | 2.63005300  |
| C  | 2.63670100  | 1.80221700  | -0.73615000 |
| C  | 2.42664700  | 3.06718000  | -0.16811600 |
| H  | 1.49132300  | 3.27889400  | 0.33977000  |
| C  | 3.39015300  | 4.06982800  | -0.27906000 |
| H  | 3.19524300  | 5.04263900  | 0.16524200  |
| C  | 4.59821300  | 3.84707600  | -0.95286300 |
| C  | 4.79312100  | 2.58808700  | -1.53691100 |
| H  | 5.70812900  | 2.39089000  | -2.08999100 |
| C  | 3.82987200  | 1.58369700  | -1.44160800 |
| H  | 3.99800400  | 0.62947500  | -1.92707500 |
| C  | 5.65696300  | 4.92065800  | -1.03838100 |
| H  | 6.23292600  | 4.84058200  | -1.96513700 |
| H  | 6.36843500  | 4.84117800  | -0.20681900 |
| H  | 5.21668100  | 5.92108400  | -0.99403100 |
| C  | 3.41892300  | -1.38565200 | -0.20052000 |
| C  | 4.52447500  | -1.06168200 | 0.60362800  |
| H  | 4.39635700  | -0.45235300 | 1.49070700  |
| C  | 5.80205600  | -1.51729800 | 0.27249800  |
| H  | 6.64336500  | -1.26244900 | 0.90996700  |
| C  | 5.99629600  | -2.29315600 | -0.87081800 |
| H  | 6.98996400  | -2.64862100 | -1.12689400 |
| C  | 4.90590200  | -2.61174900 | -1.68446300 |
| H  | 5.04743400  | -3.21448000 | -2.57650300 |
| C  | 3.62751700  | -2.16324400 | -1.35175500 |
| H  | 2.78995600  | -2.42199700 | -1.98937300 |
| C  | 1.84912300  | -0.34327800 | 1.97229400  |
| C  | 1.55777800  | 0.92085200  | 2.49824900  |
| H  | 1.30582400  | 1.73442000  | 1.83176700  |
| C  | 1.59637700  | 1.14090700  | 3.87750700  |
| H  | 1.37380100  | 2.12874300  | 4.26946500  |
| C  | 1.91617900  | 0.09688000  | 4.74543300  |
| H  | 1.94482600  | 0.26752400  | 5.81740800  |
| C  | 2.20245700  | -1.17130900 | 4.23016400  |
| H  | 2.45480700  | -1.98853300 | 4.89901100  |
| C  | 2.17258000  | -1.39075300 | 2.85361800  |
| H  | 2.41351800  | -2.37738900 | 2.46967400  |
| N  | -1.32824100 | 1.05612900  | -0.79785700 |
| N  | 1.60649000  | 0.79387200  | -0.67307200 |
| Si | 0.16517400  | 0.84015000  | -1.75619400 |
| P  | -1.87891500 | -0.38504600 | -0.03421300 |
| P  | 1.74616300  | -0.69018000 | 0.16897300  |

|    |             |             |             |
|----|-------------|-------------|-------------|
| Ir | -0.05343300 | -2.01024400 | -0.48720000 |
| H  | 1.05307200  | -2.98234500 | -1.09184000 |
| Cl | -1.63989400 | -3.58869100 | -1.57670000 |
| C  | -0.15233800 | -3.10451400 | 1.06635300  |
| O  | -0.20963700 | -3.82767400 | 1.96716800  |

TS\_CO

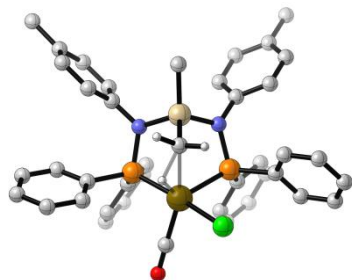

|    |             |             |             |
|----|-------------|-------------|-------------|
| F  | -1.90390600 | -0.44797800 | -0.01207400 |
| P  | 1.72660600  | -0.62108200 | 0.19012600  |
| Si | 0.09514200  | 0.93707300  | -1.68208700 |
| N  | -1.42166200 | 1.04531500  | -0.76032000 |
| N  | 1.54461000  | 0.89017300  | -0.62055400 |
| C  | -2.31983500 | -0.11594100 | 1.75424300  |
| C  | -1.74707000 | -0.93726900 | 2.73565500  |
| H  | -1.04110000 | -1.70582900 | 2.43878900  |
| C  | -2.08090500 | -0.77765100 | 4.08243900  |
| H  | -1.63091500 | -1.42705700 | 4.82737000  |
| C  | -2.98248900 | 0.21456900  | 4.46536700  |
| H  | -3.24143800 | 0.34218100  | 5.51290300  |
| C  | -3.56143700 | 1.03889600  | 3.49633800  |
| H  | -4.27217000 | 1.80713100  | 3.78790800  |
| C  | -3.24332500 | 0.86994700  | 2.14941000  |
| H  | -3.72674300 | 1.49527000  | 1.40780500  |
| C  | -3.55529300 | -0.85647500 | -0.72410400 |
| C  | -3.75884700 | -0.74227400 | -2.10893000 |
| H  | -2.97100900 | -0.34305000 | -2.73905100 |
| C  | -4.96593000 | -1.12948400 | -2.68679800 |
| H  | -5.10681800 | -1.02731500 | -3.75907000 |
| C  | -5.98432800 | -1.66155100 | -1.89244800 |
| H  | -6.92361600 | -1.96911600 | -2.34309700 |
| C  | -5.78338500 | -1.80640500 | -0.52041300 |
| H  | -6.56545900 | -2.22848200 | 0.10431100  |
| C  | -4.57748100 | -1.40890000 | 0.06082100  |
| H  | -4.43798900 | -1.53122900 | 1.12920400  |
| C  | 3.42455100  | -1.23759200 | -0.19795600 |
| C  | 3.59747300  | -2.36638300 | -1.01248800 |
| H  | 2.72187900  | -2.89849200 | -1.37097400 |
| C  | 4.87935900  | -2.81497100 | -1.33837800 |
| H  | 4.99607600  | -3.69520200 | -1.96387600 |
| C  | 6.00180300  | -2.14353700 | -0.85385800 |
| H  | 6.99864700  | -2.49571000 | -1.10415800 |

|   |             |             |             |
|---|-------------|-------------|-------------|
| C | 5.84106700  | -1.02071900 | -0.03817400 |
| H | 6.71089200  | -0.49538600 | 0.34563900  |
| C | 4.56328500  | -0.57031000 | 0.28982300  |
| H | 4.45559600  | 0.29860400  | 0.93037200  |
| C | 1.84536500  | -0.26908000 | 1.99467400  |
| C | 2.56680900  | -1.12797900 | 2.83988400  |
| H | 3.11357400  | -1.96891700 | 2.42605200  |
| C | 2.59681900  | -0.90350800 | 4.21672000  |
| H | 3.16079800  | -1.57542000 | 4.85713600  |
| C | 1.91254500  | 0.18200500  | 4.76707500  |
| H | 1.94421500  | 0.36011600  | 5.83815400  |
| C | 1.18112700  | 1.03203600  | 3.93632600  |
| H | 0.63100400  | 1.86816900  | 4.35770300  |
| C | 1.13945800  | 0.80073100  | 2.56131600  |
| H | 0.54293000  | 1.44473800  | 1.92535100  |
| C | -2.09172900 | 2.30531300  | -0.58100300 |
| C | -1.51236800 | 3.30094500  | 0.21850900  |
| H | -0.56402500 | 3.10112600  | 0.70675800  |
| C | -2.13322200 | 4.53860100  | 0.38574500  |
| H | -1.65558000 | 5.29351900  | 1.00573600  |
| C | -3.36180200 | 4.82198900  | -0.22246400 |
| C | -3.93597600 | 3.82389900  | -1.02198300 |
| H | -4.88290200 | 4.01816800  | -1.52041200 |
| C | -3.31372000 | 2.59046100  | -1.20998100 |
| H | -3.77571700 | 1.84223400  | -1.84232500 |
| C | -4.05513800 | 6.14738300  | -0.01241500 |
| H | -4.83619100 | 6.07140500  | 0.75458900  |
| H | -4.53909700 | 6.49624200  | -0.93026500 |
| H | -3.35223900 | 6.91965800  | 0.31331200  |
| C | 2.58970500  | 1.87690300  | -0.70502300 |
| C | 3.50871100  | 1.84264300  | -1.76478100 |
| H | 3.44444800  | 1.04074100  | -2.49376100 |
| C | 4.50363100  | 2.81110900  | -1.87866200 |
| H | 5.20354300  | 2.75899800  | -2.70908800 |
| C | 4.62244300  | 3.84432900  | -0.93927100 |
| C | 3.70853500  | 3.86873600  | 0.12137500  |
| H | 3.77793800  | 4.65514500  | 0.86912300  |
| C | 2.70522000  | 2.90587900  | 0.23860200  |
| H | 2.01342100  | 2.94630800  | 1.07160300  |
| C | 5.68393000  | 4.90948400  | -1.08138900 |
| H | 6.58268000  | 4.51703200  | -1.56664600 |
| H | 5.97474500  | 5.31825000  | -0.10908400 |
| H | 5.32525000  | 5.74752300  | -1.69226400 |
| C | 0.12819900  | -0.72146700 | -2.54345900 |
| H | 0.99263600  | -0.73572900 | -3.22047100 |
| H | -0.75665900 | -1.00525500 | -3.11276900 |
| C | 0.22165400  | 2.46076200  | -2.77368400 |
| H | 0.33529400  | 3.38169500  | -2.19538400 |
| H | -0.68642900 | 2.55433600  | -3.37799200 |
| H | 1.07678300  | 2.38036500  | -3.45087000 |

|    |             |             |             |
|----|-------------|-------------|-------------|
| Ir | -0.00536700 | -1.93608800 | -0.54975000 |
| H  | 0.72126900  | -1.92660300 | -2.04070500 |
| Cl | -1.54398100 | -3.48976400 | -1.66273100 |
| C  | 0.41781300  | -3.32019700 | 0.62979900  |
| O  | 0.66487100  | -4.17330900 | 1.38192800  |



**IrHCl(SiNP-H){P(OMe)<sub>3</sub>} (6, OC-6-43)**

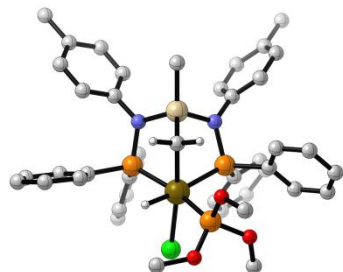

|   |             |             |             |
|---|-------------|-------------|-------------|
| C | -0.20948700 | -0.79403800 | -2.13597200 |
| H | 0.41975300  | -1.52314800 | -2.65862600 |
| H | -1.11570500 | -0.66646200 | -2.73186700 |
| C | 1.35718600  | 1.84473300  | -3.18183400 |
| H | 0.53081200  | 2.14587200  | -3.83404400 |
| H | 2.07238500  | 1.27424700  | -3.78305600 |
| H | 1.85924000  | 2.75109400  | -2.83375300 |
| C | -4.19799700 | -2.69296300 | -2.93827100 |
| H | -4.40329400 | -3.72682900 | -2.64668800 |
| H | -4.07045500 | -2.63587300 | -4.02106900 |
| H | -5.02306500 | -2.04973100 | -2.62356100 |
| C | -4.46295000 | -2.14705300 | 1.17925600  |
| H | -4.60589300 | -3.21815900 | 1.34562000  |
| H | -5.40528600 | -1.61598500 | 1.32494100  |
| H | -3.70616200 | -1.77502600 | 1.87382600  |
| C | -1.80136500 | -4.96557500 | -0.39344500 |
| H | -1.22867700 | -5.03249700 | -1.32411200 |
| H | -2.28584600 | -5.92550500 | -0.20004500 |
| H | -1.14361300 | -4.70247500 | 0.43721400  |
| C | -0.40401100 | 3.17592300  | -0.80995500 |
| C | -1.20331000 | 3.92540800  | -1.68472800 |
| H | -1.88291100 | 3.41044700  | -2.35435500 |
| C | -1.13096100 | 5.31873400  | -1.69789600 |
| H | -1.75974500 | 5.87557600  | -2.38878400 |
| C | -0.26075800 | 6.01275900  | -0.84767300 |
| C | 0.53927000  | 5.25920500  | 0.02148100  |
| H | 1.22535600  | 5.76834700  | 0.69450000  |
| C | 0.46700000  | 3.86729600  | 0.04603600  |
| H | 1.07247000  | 3.30122500  | 0.74584300  |
| C | -0.20649600 | 7.52247600  | -0.84671900 |
| H | -0.89813800 | 7.94511100  | -0.10679400 |
| H | -0.48419000 | 7.93418500  | -1.82167700 |
| H | 0.79476700  | 7.88768000  | -0.59808600 |
| C | -3.18588800 | 1.18644700  | -0.39992000 |

|   |             |             |             |
|---|-------------|-------------|-------------|
| C | -3.43071800 | 1.19109900  | -1.78235900 |
| H | -2.61015400 | 1.03184000  | -2.47376500 |
| C | -4.71655200 | 1.39765600  | -2.28099600 |
| H | -4.88247800 | 1.40704400  | -3.35489600 |
| C | -5.78624500 | 1.59326600  | -1.40444500 |
| H | -6.78807000 | 1.75674400  | -1.79169300 |
| C | -5.55857800 | 1.57772700  | -0.02855500 |
| H | -6.38332200 | 1.72926600  | 0.66255400  |
| C | -4.26989800 | 1.37453200  | 0.46998100  |
| H | -4.11154500 | 1.36735400  | 1.54281800  |
| C | -1.49333700 | 1.60428900  | 1.87393600  |
| C | -1.92591400 | 2.93227900  | 2.05722000  |
| H | -2.27019400 | 3.51599200  | 1.21077500  |
| C | -1.92939300 | 3.50522400  | 3.32746900  |
| H | -2.26127600 | 4.53212500  | 3.45353800  |
| C | -1.51396000 | 2.75963500  | 4.43468800  |
| H | -1.52279800 | 3.20713100  | 5.42510000  |
| C | -1.09966900 | 1.43971600  | 4.26524500  |
| H | -0.78374200 | 0.84921200  | 5.11989100  |
| C | -1.08591800 | 0.86243400  | 2.99214600  |
| H | -0.78520700 | -0.17248100 | 2.87202300  |
| C | 3.44111300  | 0.65244900  | -1.06681000 |
| C | 3.84780800  | 1.96513300  | -0.78290300 |
| H | 3.14306300  | 2.65379700  | -0.32815800 |
| C | 5.12926100  | 2.40672100  | -1.10894800 |
| H | 5.40965400  | 3.43292900  | -0.88307500 |
| C | 6.05797400  | 1.55638000  | -1.72093200 |
| C | 5.64288000  | 0.25268800  | -2.01953800 |
| H | 6.33068100  | -0.42646000 | -2.51794800 |
| C | 4.35812400  | -0.19274500 | -1.71085700 |
| H | 4.05851100  | -1.19786500 | -1.98172400 |
| C | 7.45952900  | 2.02329100  | -2.03573500 |
| H | 7.49077500  | 3.10119700  | -2.22204100 |
| H | 7.86191100  | 1.51587200  | -2.91798300 |
| H | 8.14456900  | 1.81770100  | -1.20326000 |
| C | 2.81121300  | -2.41408800 | 0.05207500  |
| C | 4.01567600  | -2.50588600 | 0.76732700  |
| H | 4.24359200  | -1.78481400 | 1.54366300  |
| C | 4.93413200  | -3.52022400 | 0.49033000  |
| H | 5.85764600  | -3.57677200 | 1.05954900  |
| C | 4.67047200  | -4.45240200 | -0.51296800 |
| H | 5.38532300  | -5.24180500 | -0.72778800 |
| C | 3.48033100  | -4.36589600 | -1.23866700 |
| H | 3.26457000  | -5.08770600 | -2.02147900 |
| C | 2.55813100  | -3.35818800 | -0.95632200 |
| H | 1.63196600  | -3.30466400 | -1.51755700 |
| C | 2.08301100  | -0.45214100 | 2.01261100  |
| C | 2.46035000  | 0.86946200  | 2.28042500  |
| H | 2.52099400  | 1.58291500  | 1.46950300  |
| C | 2.77116400  | 1.27045400  | 3.58130100  |

|    |             |             |             |
|----|-------------|-------------|-------------|
| H  | 3.06921900  | 2.29776900  | 3.77071900  |
| C  | 2.69926900  | 0.35571600  | 4.63155800  |
| H  | 2.94306300  | 0.66636000  | 5.64376800  |
| C  | 2.31037800  | -0.96189500 | 4.37655100  |
| H  | 2.24335200  | -1.67874600 | 5.18993700  |
| C  | 2.00284200  | -1.36654300 | 3.07802600  |
| H  | 1.68584800  | -2.38660500 | 2.89461700  |
| N  | -0.44063200 | 1.74144500  | -0.80980000 |
| N  | 2.09515900  | 0.23040700  | -0.78580800 |
| O  | -2.96315400 | -2.23371600 | -2.36247400 |
| O  | -4.07985100 | -1.90522900 | -0.18565100 |
| O  | -2.86536500 | -4.00921600 | -0.50862500 |
| Si | 0.70059500  | 0.77254000  | -1.78387800 |
| P  | -1.47758500 | 0.79901700  | 0.21361000  |
| P  | 1.62848000  | -1.00909500 | 0.31757900  |
| P  | -2.65215500 | -2.41225100 | -0.77779600 |
| Ir | -0.66215200 | -1.48222800 | -0.15101700 |
| H  | -0.08261000 | -2.90291600 | -0.58139700 |
| Cl | -1.04269700 | -2.53966000 | 2.11685800  |

**IrHCl(SiNP-H){P(OMe)<sub>3</sub>} (6', OC-6-34)**

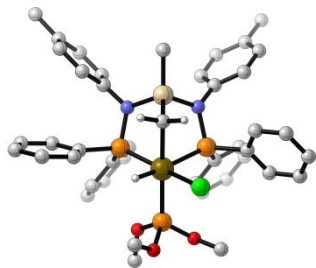

|   |             |             |             |
|---|-------------|-------------|-------------|
| C | 0.16670700  | -0.07003300 | -2.53237900 |
| H | 1.05861900  | -0.38503200 | -3.08340900 |
| H | -0.68876200 | -0.12604000 | -3.20917600 |
| C | 0.82085900  | 3.13313900  | -2.52074100 |
| H | -0.03394500 | 3.44030800  | -3.13214300 |
| H | 1.68299400  | 3.00440000  | -3.18152100 |
| H | 1.04634500  | 3.94677300  | -1.82562700 |
| C | 0.08948000  | -4.19505600 | 2.92721100  |
| H | -0.89644800 | -4.11535200 | 3.39148600  |
| H | 0.86761700  | -4.00711200 | 3.66944300  |
| H | 0.21233100  | -5.19506100 | 2.50172400  |
| C | 0.15944500  | -5.09090100 | -1.10587700 |
| H | -0.19101700 | -4.58038500 | -2.00505300 |
| H | 0.00817500  | -6.16863600 | -1.20245200 |
| H | 1.22447200  | -4.89009800 | -0.95008300 |
| C | -3.32220000 | -3.74089500 | 0.65649700  |
| H | -3.56710900 | -3.11487000 | -0.20365100 |
| H | -4.12572900 | -3.70406700 | 1.39550200  |
| H | -3.17051400 | -4.77122100 | 0.32466600  |
| C | -1.56678500 | 3.08591800  | -0.39948200 |
| C | -2.65285200 | 3.66384500  | -1.07476200 |
| H | -3.16085400 | 3.09715400  | -1.84602300 |
| C | -3.08032800 | 4.95353300  | -0.76057100 |
| H | -3.92361600 | 5.37748500  | -1.30108400 |
| C | -2.43750400 | 5.71880600  | 0.22186300  |
| C | -1.34480200 | 5.14331300  | 0.88155400  |
| H | -0.81903100 | 5.71366000  | 1.64378000  |
| C | -0.92054100 | 3.84889700  | 0.58376400  |
| H | -0.07636400 | 3.41897900  | 1.11280700  |
| C | -2.92089900 | 7.10722200  | 0.56932800  |
| H | -3.74075400 | 7.07354900  | 1.29818000  |
| H | -3.29670900 | 7.63336800  | -0.31386000 |
| H | -2.12120100 | 7.71165600  | 1.00772200  |
| C | -3.48159700 | 0.22053800  | -0.93805300 |

|   |             |             |             |
|---|-------------|-------------|-------------|
| C | -3.61689700 | 0.53704100  | -2.29831100 |
| H | -2.75463600 | 0.88193400  | -2.85806600 |
| C | -4.84700100 | 0.41156000  | -2.94157300 |
| H | -4.93203400 | 0.66686400  | -3.99402400 |
| C | -5.96112200 | -0.05461200 | -2.24053800 |
| H | -6.91934100 | -0.15562700 | -2.74236200 |
| C | -5.83378100 | -0.39751900 | -0.89484500 |
| H | -6.69316400 | -0.76634900 | -0.34161700 |
| C | -4.60298900 | -0.26241700 | -0.24796800 |
| H | -4.52299300 | -0.52803500 | 0.80064900  |
| C | -2.26672600 | 0.60690300  | 1.62274000  |
| C | -3.18113800 | 1.61609400  | 1.98322100  |
| H | -3.63965700 | 2.23410000  | 1.21990800  |
| C | -3.52015200 | 1.82388100  | 3.31889900  |
| H | -4.22518200 | 2.60873900  | 3.57812300  |
| C | -2.96187100 | 1.02203300  | 4.31813900  |
| H | -3.23278100 | 1.18041800  | 5.35855200  |
| C | -2.06226100 | 0.01535300  | 3.97279700  |
| H | -1.62367400 | -0.61512700 | 4.74056400  |
| C | -1.71500600 | -0.18947200 | 2.63468000  |
| H | -1.01356600 | -0.97441600 | 2.38418500  |
| C | 2.97642900  | 1.91851600  | -0.50149900 |
| C | 3.20740800  | 2.84246400  | 0.52594500  |
| H | 2.49161800  | 2.93108000  | 1.33430600  |
| C | 4.34800300  | 3.64713300  | 0.52034000  |
| H | 4.50102300  | 4.35485700  | 1.33176000  |
| C | 5.29330500  | 3.56409800  | -0.50833300 |
| C | 5.05966900  | 2.63777400  | -1.53400600 |
| H | 5.77730300  | 2.54512400  | -2.34586900 |
| C | 3.92517500  | 1.82998500  | -1.53345600 |
| H | 3.76860500  | 1.11240400  | -2.33272900 |
| C | 6.50953400  | 4.45986400  | -0.52971300 |
| H | 6.33841900  | 5.34789300  | -1.15133700 |
| H | 7.38166300  | 3.94205400  | -0.94142800 |
| H | 6.76700400  | 4.81031400  | 0.47417600  |
| C | 3.31861700  | -1.27625200 | -0.50563400 |
| C | 4.51352700  | -0.93995900 | 0.15704500  |
| H | 4.49093600  | -0.28832800 | 1.02281300  |
| C | 5.74117000  | -1.43375600 | -0.28404900 |
| H | 6.64912100  | -1.16362900 | 0.24766200  |
| C | 5.80312100  | -2.26367400 | -1.40413700 |
| H | 6.75918400  | -2.64998700 | -1.74642500 |
| C | 4.62911900  | -2.58947400 | -2.08355900 |
| H | 4.66455300  | -3.22921000 | -2.96088000 |
| C | 3.39956300  | -2.09881200 | -1.63937200 |
| H | 2.49342800  | -2.35774700 | -2.17471800 |
| C | 1.94055100  | -0.39338700 | 1.85666700  |
| C | 1.43207800  | 0.70966700  | 2.55393100  |
| H | 0.90982900  | 1.48781700  | 2.01001200  |
| C | 1.57917000  | 0.81359900  | 3.93863500  |

|    |             |             |             |
|----|-------------|-------------|-------------|
| H  | 1.17763300  | 1.67884200  | 4.45794000  |
| C  | 2.23211400  | -0.19264800 | 4.64957900  |
| H  | 2.35449700  | -0.11098500 | 5.72601100  |
| C  | 2.72580200  | -1.30851000 | 3.96893900  |
| H  | 3.23471500  | -2.09869200 | 4.51425100  |
| C  | 2.57715200  | -1.41082300 | 2.58615300  |
| H  | 2.96584200  | -2.28317500 | 2.07357600  |
| N  | -1.09229400 | 1.77087100  | -0.72312100 |
| N  | 1.78244400  | 1.11777500  | -0.54109000 |
| O  | 0.25199500  | -3.18926300 | 1.91377200  |
| O  | -0.61740900 | -4.68723700 | 0.03201000  |
| O  | -2.14464300 | -3.25582900 | 1.32772600  |
| Si | 0.41849400  | 1.51715200  | -1.64710000 |
| P  | -1.81201400 | 0.30590900  | -0.14530300 |
| P  | 1.70581000  | -0.51404600 | 0.02446600  |
| P  | -0.69252000 | -3.14737600 | 0.58430200  |
| Ir | -0.22097400 | -1.42871700 | -0.87731200 |
| H  | 0.74129300  | -2.43547500 | -1.63369400 |
| Cl | -1.92476600 | -2.47535900 | -2.33147800 |

**IrCl(SiNP){P(OMe)<sub>3</sub>} (7)**

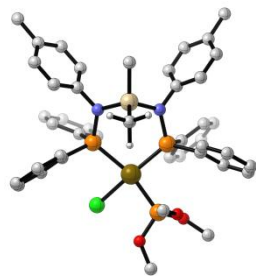

|    |             |             |             |
|----|-------------|-------------|-------------|
| Si | 1.02803600  | 1.28306600  | -1.79272800 |
| C  | 0.44779700  | 0.27085400  | -3.27580400 |
| H  | -0.18699600 | 0.87258100  | -3.93576000 |
| H  | 1.31916300  | -0.03586000 | -3.86614900 |
| H  | -0.10199800 | -0.62564800 | -2.97869400 |
| C  | 1.92236900  | 2.78832700  | -2.48075100 |
| H  | 2.75376500  | 2.46453100  | -3.11495100 |
| H  | 1.23528500  | 3.37693800  | -3.09719900 |
| H  | 2.32637100  | 3.44534600  | -1.70819300 |
| N  | -0.32850000 | 1.85176300  | -0.79280700 |
| N  | 2.18441200  | 0.34721300  | -0.82236500 |
| P  | -1.43725200 | 0.72839700  | -0.05029900 |
| P  | 1.65879500  | -0.99693600 | 0.14069400  |
| Ir | -0.67704900 | -1.36898300 | 0.25818800  |
| C  | -0.43429200 | 3.27605600  | -0.59356300 |
| C  | -1.24769500 | 4.07170600  | -1.41075300 |
| C  | 0.30935000  | 3.90032600  | 0.41833100  |
| C  | -1.31649800 | 5.45206100  | -1.21255800 |
| H  | -1.83577000 | 3.60329500  | -2.19223200 |
| C  | 0.24293600  | 5.27957300  | 0.60309800  |
| H  | 0.92527400  | 3.28675500  | 1.06848500  |
| C  | -0.57107500 | 6.08252100  | -0.20843900 |
| H  | -1.95859700 | 6.04932300  | -1.85572900 |
| H  | 0.82741900  | 5.73955800  | 1.39645900  |
| C  | 3.56672200  | 0.76388300  | -0.82144300 |
| C  | 4.50036200  | 0.20896300  | -1.70583100 |
| C  | 3.99899000  | 1.76789300  | 0.05759700  |
| C  | 5.82548000  | 0.64957500  | -1.70744800 |
| H  | 4.19016000  | -0.57643900 | -2.38534800 |
| C  | 5.32066900  | 2.20634600  | 0.04543700  |
| H  | 3.28827000  | 2.19290800  | 0.75890900  |
| C  | 6.26014300  | 1.65703100  | -0.83848100 |
| H  | 6.53196400  | 0.20047100  | -2.40154600 |
| H  | 5.62928200  | 2.98475900  | 0.73938000  |

|   |             |             |             |
|---|-------------|-------------|-------------|
| C | -0.61929700 | 7.58077800  | -0.02132300 |
| H | 0.21519200  | 8.07258100  | -0.53710200 |
| H | -1.54456800 | 8.00525900  | -0.42182400 |
| H | -0.55095000 | 7.85540600  | 1.03609900  |
| C | 7.68633100  | 2.15441600  | -0.86476300 |
| H | 8.35868000  | 1.41904200  | -1.31613500 |
| H | 7.77441800  | 3.07962700  | -1.44828900 |
| H | 8.05285600  | 2.37381000  | 0.14324000  |
| C | -3.02440500 | 1.06291400  | -0.97815800 |
| C | -4.26121800 | 1.18622500  | -0.32872000 |
| C | -3.00485400 | 1.13122700  | -2.37989500 |
| C | -5.43737800 | 1.38148800  | -1.05793200 |
| H | -4.31218900 | 1.13378800  | 0.75231600  |
| C | -4.17654800 | 1.32833800  | -3.11019900 |
| H | -2.06321300 | 1.03532600  | -2.90649100 |
| C | -5.40092000 | 1.45481800  | -2.44986600 |
| H | -6.38272900 | 1.48486900  | -0.53179400 |
| H | -4.13266400 | 1.38637100  | -4.19465900 |
| H | -6.31513300 | 1.61203600  | -3.01536300 |
| C | 2.48545200  | -2.46123400 | -0.64152100 |
| C | 3.04805300  | -3.50183500 | 0.11274100  |
| C | 2.46307100  | -2.58535000 | -2.03860700 |
| C | 3.60107300  | -4.61714700 | -0.51873400 |
| H | 3.03981500  | -3.45311400 | 1.19400800  |
| C | 3.01130900  | -3.70239300 | -2.66954500 |
| H | 2.01271500  | -1.80516200 | -2.63994500 |
| C | 3.58798300  | -4.72132400 | -1.90968600 |
| H | 4.03435400  | -5.41064400 | 0.08353800  |
| H | 2.98440900  | -3.77598400 | -3.75338800 |
| H | 4.01657000  | -5.59236800 | -2.39756100 |
| C | 2.55654100  | -0.76681500 | 1.73825000  |
| C | 3.93705200  | -0.98683900 | 1.87773500  |
| C | 1.83610100  | -0.29156500 | 2.84280700  |
| C | 4.57415800  | -0.74309800 | 3.09478100  |
| H | 4.51960500  | -1.34984400 | 1.03855800  |
| C | 2.47508100  | -0.04109100 | 4.05770400  |
| H | 0.76959700  | -0.12743400 | 2.74975700  |
| C | 3.84549800  | -0.26959400 | 4.18736200  |
| H | 5.64183100  | -0.92186300 | 3.18652400  |
| H | 1.89784600  | 0.32318300  | 4.90280000  |
| H | 4.34350200  | -0.08253600 | 5.13485200  |
| C | -1.87609700 | 1.45446000  | 1.61414600  |
| C | -2.39036300 | 2.75194000  | 1.79080300  |
| C | -1.76165800 | 0.62767400  | 2.74348800  |
| C | -2.73491900 | 3.21590600  | 3.06098900  |
| H | -2.54089500 | 3.40419300  | 0.93947800  |
| C | -2.11121200 | 1.09053300  | 4.01407600  |
| H | -1.41979600 | -0.39584500 | 2.60650100  |
| C | -2.59017300 | 2.39014300  | 4.17773100  |
| H | -3.12358000 | 4.22425100  | 3.17414600  |

|    |             |             |             |
|----|-------------|-------------|-------------|
| H  | -2.01706800 | 0.42809300  | 4.86997200  |
| H  | -2.86271400 | 2.75390800  | 5.16481900  |
| P  | -2.72667100 | -2.30554500 | 0.01322400  |
| O  | -3.88570800 | -1.83037600 | 1.05993200  |
| O  | -2.65556500 | -3.92976800 | 0.08670500  |
| O  | -3.57693000 | -2.07650800 | -1.38043200 |
| C  | -3.78318300 | -4.79706400 | -0.03887100 |
| H  | -4.49228200 | -4.43926100 | -0.79304400 |
| H  | -3.39738500 | -5.77348100 | -0.34019500 |
| H  | -4.29172800 | -4.90061500 | 0.92559200  |
| C  | -5.30406100 | -1.93652100 | 0.86088400  |
| H  | -5.58946400 | -1.55389800 | -0.12051000 |
| H  | -5.64211500 | -2.97138400 | 0.96906300  |
| H  | -5.76639900 | -1.33094800 | 1.64330800  |
| C  | -2.96270700 | -2.41520800 | -2.62837800 |
| H  | -2.94849700 | -3.50133400 | -2.77331600 |
| H  | -3.56281900 | -1.94698200 | -3.41065300 |
| H  | -1.93669000 | -2.03668100 | -2.67476600 |
| Cl | 0.03502900  | -3.34905300 | 1.45487400  |

TS\_7\_6'

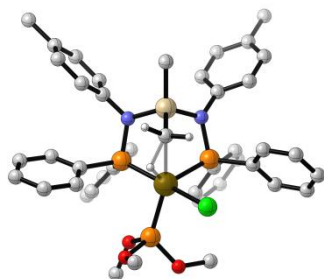

|    |             |             |             |
|----|-------------|-------------|-------------|
| P  | -1.90065400 | -0.29415900 | -0.04323800 |
| P  | 1.67065100  | 0.04972900  | 0.10159500  |
| Si | -0.18354900 | 1.48235100  | -1.66996400 |
| N  | -1.69803900 | 1.28501200  | -0.75219900 |
| N  | 1.25963700  | 1.57660400  | -0.61443700 |
| C  | -2.30765600 | -0.05623400 | 1.74535100  |
| C  | -1.54686500 | -0.75364900 | 2.69420000  |
| H  | -0.70326900 | -1.34937700 | 2.35978700  |
| C  | -1.85492100 | -0.67374600 | 4.05471600  |
| H  | -1.25391400 | -1.22177100 | 4.77443500  |
| C  | -2.91924000 | 0.11765500  | 4.48473600  |
| H  | -3.15946900 | 0.18282300  | 5.54252400  |
| C  | -3.68007300 | 0.82525100  | 3.54960200  |
| H  | -4.51292600 | 1.44095300  | 3.87799200  |
| C  | -3.38436000 | 0.73394100  | 2.18983000  |
| H  | -4.00293800 | 1.26560200  | 1.47590300  |
| C  | -3.51101700 | -0.91823200 | -0.70132400 |
| C  | -3.76587000 | -0.82836400 | -2.07989300 |
| H  | -3.05126900 | -0.33124400 | -2.72691400 |
| C  | -4.92853200 | -1.36488600 | -2.62898200 |
| H  | -5.10901900 | -1.27766700 | -3.69666400 |
| C  | -5.84845100 | -2.02828900 | -1.81355600 |
| H  | -6.75251600 | -2.45172800 | -2.24195000 |
| C  | -5.59300900 | -2.15231700 | -0.44850700 |
| H  | -6.29867000 | -2.67190100 | 0.19391900  |
| C  | -4.43319400 | -1.60319900 | 0.10407300  |
| H  | -4.25644500 | -1.70417500 | 1.16937300  |
| C  | 3.44344100  | -0.24427000 | -0.35418100 |
| C  | 3.77303900  | -1.23668800 | -1.28809100 |
| H  | 2.98284900  | -1.86483900 | -1.68458300 |
| C  | 5.09830700  | -1.42994100 | -1.68402900 |
| H  | 5.33562200  | -2.20901100 | -2.40296500 |
| C  | 6.11276300  | -0.63477800 | -1.15114900 |
| H  | 7.14448400  | -0.78810700 | -1.45561700 |

|   |             |             |             |
|---|-------------|-------------|-------------|
| C | 5.79752000  | 0.35731200  | -0.21990800 |
| H | 6.58124800  | 0.98183400  | 0.19953700  |
| C | 4.47481700  | 0.55282100  | 0.17547700  |
| H | 4.24854400  | 1.32694000  | 0.90032100  |
| C | 1.80112700  | 0.41560500  | 1.91188000  |
| C | 2.73988000  | -0.23149000 | 2.73117800  |
| H | 3.41955900  | -0.95807200 | 2.30313700  |
| C | 2.81113100  | 0.05631600  | 4.09442900  |
| H | 3.55152900  | -0.44606400 | 4.71089000  |
| C | 1.94280800  | 0.99033000  | 4.66357300  |
| H | 2.00411000  | 1.21809100  | 5.72413000  |
| C | 0.99399600  | 1.62593100  | 3.86273300  |
| H | 0.30249700  | 2.34216600  | 4.29673300  |
| C | 0.92169200  | 1.33498600  | 2.49969200  |
| H | 0.16885600  | 1.81941500  | 1.88882600  |
| C | -2.56717600 | 2.40532900  | -0.51768400 |
| C | -2.15842500 | 3.45078200  | 0.32361800  |
| H | -1.18737300 | 3.39190600  | 0.80497700  |
| C | -2.97458800 | 4.56092000  | 0.53823800  |
| H | -2.62608900 | 5.35946300  | 1.18904800  |
| C | -4.23475400 | 4.66239400  | -0.06330800 |
| C | -4.63919100 | 3.61584000  | -0.90329400 |
| H | -5.60639600 | 3.67139400  | -1.39769800 |
| C | -3.82224400 | 2.51034500  | -1.13749000 |
| H | -4.15573400 | 1.72264100  | -1.80212200 |
| C | -5.13569800 | 5.84676900  | 0.19634800  |
| H | -5.69891100 | 6.12569500  | -0.69995900 |
| H | -4.56404700 | 6.72102300  | 0.52155800  |
| H | -5.86922100 | 5.62559400  | 0.98208100  |
| C | 2.14574900  | 2.70965500  | -0.64512400 |
| C | 3.05753800  | 2.86563700  | -1.70131800 |
| H | 3.10970500  | 2.09906200  | -2.46828400 |
| C | 3.88947300  | 3.98067200  | -1.77011400 |
| H | 4.58230700  | 4.07699200  | -2.60271900 |
| C | 3.85001700  | 4.97785900  | -0.78572600 |
| C | 2.93896900  | 4.81952400  | 0.26504300  |
| H | 2.87845800  | 5.58107800  | 1.03897200  |
| C | 2.09899300  | 3.70712500  | 0.33760700  |
| H | 1.40299500  | 3.61089700  | 1.16211800  |
| C | 4.77650400  | 6.16939800  | -0.84646200 |
| H | 5.75615700  | 5.93402100  | -0.41146600 |
| H | 4.37088500  | 7.02084600  | -0.29210000 |
| H | 4.95079300  | 6.48947100  | -1.87852800 |
| C | 0.13232200  | -0.05301700 | -2.67993800 |
| H | 0.99780500  | 0.14486500  | -3.32688600 |
| H | -0.68605600 | -0.42797400 | -3.29350900 |
| C | -0.31117500 | 3.09187500  | -2.63559300 |
| H | -1.23205400 | 3.09280100  | -3.22785300 |
| H | 0.53534600  | 3.19408700  | -3.32085000 |
| H | -0.32851300 | 3.97377200  | -1.98956700 |

|    |             |             |             |
|----|-------------|-------------|-------------|
| Ir | 0.13529000  | -1.42271700 | -0.77100100 |
| H  | 0.86324400  | -1.16610300 | -2.25472400 |
| P  | 0.89882300  | -3.21537700 | 0.31836100  |
| O  | 2.10258600  | -4.16232400 | -0.30801200 |
| O  | 1.61329900  | -2.90703900 | 1.75541100  |
| O  | -0.10888300 | -4.47906000 | 0.67316700  |
| C  | 1.91604700  | -4.79836200 | -1.57904400 |
| H  | 2.87911000  | -5.23689300 | -1.85073600 |
| H  | 1.15829200  | -5.58388800 | -1.50788800 |
| H  | 1.60515900  | -4.07270800 | -2.33741300 |
| C  | 2.22270800  | -3.94564500 | 2.53893600  |
| H  | 3.12324700  | -4.32098100 | 2.04649500  |
| H  | 2.48116500  | -3.49250900 | 3.49856500  |
| H  | 1.52505300  | -4.77299400 | 2.69618300  |
| C  | -1.47623700 | -4.27200900 | 1.05201000  |
| H  | -2.02528000 | -3.76778800 | 0.25401200  |
| H  | -1.89748900 | -5.26726100 | 1.21276200  |
| H  | -1.54758100 | -3.69997000 | 1.98364000  |
| Cl | -1.18694200 | -2.99958300 | -2.14767800 |

TS\_7\_6

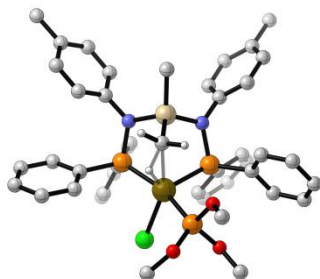

|   |             |             |             |
|---|-------------|-------------|-------------|
| P | -1.53374400 | 0.77484200  | 0.24931700  |
| P | 1.64622100  | -0.91272000 | 0.36534600  |
| N | -0.55072300 | 1.76546200  | -0.81105800 |
| N | 2.07831400  | 0.33359500  | -0.76071800 |
| C | -1.53337400 | 1.57143200  | 1.91613200  |
| C | -1.10226100 | 0.79725000  | 3.00361800  |
| H | -0.77522500 | -0.22445900 | 2.83599300  |
| C | -1.11439300 | 1.32721400  | 4.29699100  |
| H | -0.77820000 | 0.71471000  | 5.12824300  |
| C | -1.55415200 | 2.63202100  | 4.51565100  |
| H | -1.56287100 | 3.04398000  | 5.52143400  |
| C | -1.99611700 | 3.40807700  | 3.43968800  |
| H | -2.34913000 | 4.42216000  | 3.60704100  |
| C | -1.99373000 | 2.88089400  | 2.14929200  |
| H | -2.36134600 | 3.48352000  | 1.32590700  |
| C | -3.26492500 | 1.12138400  | -0.30893000 |
| C | -3.55852300 | 1.22228400  | -1.67879800 |
| H | -2.75095900 | 1.18193200  | -2.40219100 |
| C | -4.87137000 | 1.37169200  | -2.12434800 |
| H | -5.07187900 | 1.46223200  | -3.18880300 |
| C | -5.92477000 | 1.40323000  | -1.20775200 |
| H | -6.94820600 | 1.52219300  | -1.55268100 |
| C | -5.65045900 | 1.27820600  | 0.15545400  |
| H | -6.46143000 | 1.29793200  | 0.87866800  |
| C | -4.33506500 | 1.13731600  | 0.60102800  |
| H | -4.14146400 | 1.04176800  | 1.66397000  |
| C | 2.82958700  | -2.31422300 | 0.09920700  |
| C | 2.40040800  | -3.45433900 | -0.59415100 |
| H | 1.36045800  | -3.51111000 | -0.90652600 |
| C | 3.28439200  | -4.50422800 | -0.85018700 |
| H | 2.93619500  | -5.38436600 | -1.38387600 |
| C | 4.60611000  | -4.43055400 | -0.40793500 |
| H | 5.29289400  | -5.25024900 | -0.60088400 |
| C | 5.04113500  | -3.30380800 | 0.29352200  |

|    |             |             |             |
|----|-------------|-------------|-------------|
| H  | 6.06721200  | -3.24259200 | 0.64533200  |
| C  | 4.15990500  | -2.25271100 | 0.54687400  |
| H  | 4.50952800  | -1.38522700 | 1.09673200  |
| C  | 2.16489600  | -0.32359700 | 2.03385400  |
| C  | 2.30787500  | -1.24518900 | 3.08549200  |
| H  | 2.14111900  | -2.30053200 | 2.90521900  |
| C  | 2.65004200  | -0.80672500 | 4.36460900  |
| H  | 2.75443100  | -1.53050300 | 5.16799300  |
| C  | 2.85983600  | 0.55178900  | 4.61261300  |
| H  | 3.13317700  | 0.88911200  | 5.60863800  |
| C  | 2.71509200  | 1.47328600  | 3.57558900  |
| H  | 2.87194600  | 2.53241800  | 3.75941100  |
| C  | 2.36289000  | 1.03727300  | 2.29742500  |
| H  | 2.24435300  | 1.75678500  | 1.49781100  |
| C  | -0.56237400 | 3.20370900  | -0.82146200 |
| C  | 0.31144900  | 3.92569000  | 0.00553600  |
| H  | 0.96280800  | 3.38194700  | 0.68104100  |
| C  | 0.33488400  | 5.31932200  | -0.01773300 |
| H  | 1.02556400  | 5.85087200  | 0.63285200  |
| C  | -0.51905400 | 6.04554400  | -0.85760400 |
| C  | -1.39093000 | 5.32167900  | -1.68108900 |
| H  | -2.06067700 | 5.85630100  | -2.35082200 |
| C  | -1.41358800 | 3.92698900  | -1.66944700 |
| H  | -2.09604800 | 3.39280900  | -2.31963600 |
| C  | -0.51953100 | 7.55613700  | -0.85541000 |
| H  | -0.78824200 | 7.95861000  | -1.83695300 |
| H  | 0.46136200  | 7.95702600  | -0.58236100 |
| H  | -1.24462200 | 7.95265200  | -0.13327200 |
| C  | 3.41961500  | 0.71357700  | -1.11730800 |
| C  | 4.21121100  | -0.11295500 | -1.92995800 |
| H  | 3.81476600  | -1.06717400 | -2.25943900 |
| C  | 5.49157800  | 0.28032300  | -2.31591600 |
| H  | 6.08161200  | -0.38081300 | -2.94629600 |
| C  | 6.02661800  | 1.51245000  | -1.91819400 |
| C  | 5.22504100  | 2.34370200  | -1.12652900 |
| H  | 5.60344000  | 3.31487000  | -0.81630100 |
| C  | 3.94656100  | 1.95313800  | -0.72895600 |
| H  | 3.34141100  | 2.62584000  | -0.13119600 |
| C  | 7.42552100  | 1.92121600  | -2.31529800 |
| H  | 7.70410100  | 1.50306000  | -3.28751500 |
| H  | 8.16539200  | 1.56685100  | -1.58627800 |
| H  | 7.52404700  | 3.00944900  | -2.37378100 |
| C  | -0.05814300 | -0.72898000 | -2.42316800 |
| H  | 0.67756600  | -1.13266800 | -3.13507200 |
| H  | -1.01819300 | -0.63092800 | -2.92783900 |
| C  | 1.30846700  | 1.98833100  | -3.09615200 |
| H  | 0.47873500  | 2.30507600  | -3.73662100 |
| H  | 2.03758500  | 1.45910300  | -3.71755400 |
| H  | 1.79209000  | 2.88927900  | -2.70966200 |
| Ir | -0.59690600 | -1.38774800 | -0.09892600 |

|    |             |             |             |
|----|-------------|-------------|-------------|
| H  | -0.08026800 | -1.75913200 | -1.77898800 |
| P  | -2.50971300 | -2.46140500 | -0.69593200 |
| O  | -3.09284500 | -1.96137400 | -2.14053800 |
| O  | -2.53946400 | -4.07335100 | -1.02259400 |
| O  | -3.72068300 | -2.29349500 | 0.38248900  |
| C  | -3.89582600 | -2.73897100 | -3.03711200 |
| H  | -4.00027100 | -2.14355400 | -3.94680600 |
| H  | -3.41536900 | -3.69208200 | -3.26889400 |
| H  | -4.89059400 | -2.92876400 | -2.62223000 |
| C  | -1.93093100 | -5.04253100 | -0.15220400 |
| H  | -2.05615700 | -6.00969800 | -0.64505400 |
| H  | -0.87264900 | -4.82028300 | -0.00488000 |
| H  | -2.42196400 | -5.05390300 | 0.82446100  |
| C  | -5.01181900 | -2.89667900 | 0.24421600  |
| H  | -4.94135500 | -3.90057500 | -0.18592500 |
| H  | -5.43925200 | -2.96327300 | 1.24692900  |
| H  | -5.65584500 | -2.26682100 | -0.37848700 |
| Si | 0.66978300  | 0.86421900  | -1.72886700 |
| Cl | -0.55388800 | -2.79603800 | 1.93942900  |

### RhCl(SiNP){P(OMe)<sub>3</sub>} (8)

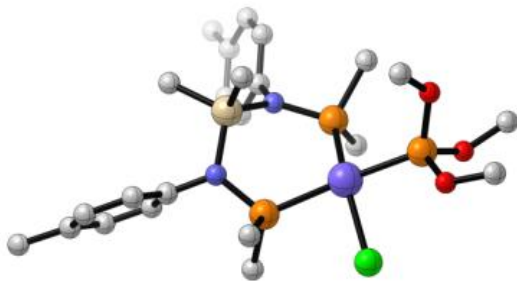

|    |             |             |             |
|----|-------------|-------------|-------------|
| Si | 0.98149100  | 1.17712200  | -1.79656600 |
| C  | 0.37245400  | 0.13110000  | -3.24469500 |
| H  | -0.28056400 | 0.71396800  | -3.90342100 |
| H  | 1.23166700  | -0.18540300 | -3.84736400 |
| H  | -0.16641900 | -0.76307700 | -2.92079900 |
| C  | 1.86378300  | 2.66999600  | -2.52377600 |
| H  | 2.68899600  | 2.33648000  | -3.16091300 |
| H  | 1.16837100  | 3.24619600  | -3.14260900 |
| H  | 2.27523500  | 3.34082000  | -1.76712900 |
| N  | -0.37738600 | 1.76548300  | -0.80618000 |
| N  | 2.14625700  | 0.25484000  | -0.82584400 |
| P  | -1.49760800 | 0.65437400  | -0.06620500 |
| P  | 1.61622000  | -1.08670600 | 0.14970000  |
| C  | -0.46091600 | 3.18879600  | -0.58824600 |
| C  | -1.26383100 | 4.00653900  | -1.39402500 |
| C  | 0.29082600  | 3.78873100  | 0.43224700  |
| C  | -1.31355300 | 5.38475300  | -1.17722500 |
| H  | -1.85831000 | 3.55721300  | -2.18169600 |
| C  | 0.24320800  | 5.16630100  | 0.63564700  |
| H  | 0.89808100  | 3.15846700  | 1.07443600  |
| C  | -0.55930500 | 5.99129500  | -0.16490300 |
| H  | -1.94740800 | 5.99942800  | -1.81208600 |
| H  | 0.83367000  | 5.60725700  | 1.43532900  |
| C  | 3.52568100  | 0.68022600  | -0.82751600 |
| C  | 4.46362400  | 0.12361500  | -1.70654100 |
| C  | 3.95229600  | 1.69290100  | 0.04439600  |
| C  | 5.78627200  | 0.57134800  | -1.71051900 |
| H  | 4.15871200  | -0.66894700 | -2.38002600 |
| C  | 5.27165800  | 2.13837200  | 0.02995200  |
| H  | 3.23933500  | 2.11933400  | 0.74253100  |
| C  | 6.21483500  | 1.58788400  | -0.84915600 |
| H  | 6.49571900  | 0.12064100  | -2.40058100 |
| H  | 5.57546500  | 2.92345600  | 0.71850500  |
| C  | -0.58693400 | 7.48745300  | 0.04194100  |

|   |             |             |             |
|---|-------------|-------------|-------------|
| H | 0.24830300  | 7.97546600  | -0.47620300 |
| H | -1.51082600 | 7.92849300  | -0.34365400 |
| H | -0.50446100 | 7.74742400  | 1.10198900  |
| C | 7.63823800  | 2.09303200  | -0.87839800 |
| H | 8.31538300  | 1.35698800  | -1.32146300 |
| H | 7.72220200  | 3.01289600  | -1.47097400 |
| H | 8.00207000  | 2.32440300  | 0.12789500  |
| C | -3.09022300 | 1.00089500  | -0.97457500 |
| C | -4.32469200 | 1.07200400  | -0.31177300 |
| C | -3.08320100 | 1.11304500  | -2.37350600 |
| C | -5.51070400 | 1.25923300  | -1.02584400 |
| H | -4.36524000 | 0.98500900  | 0.76766000  |
| C | -4.26594800 | 1.30240900  | -3.08849300 |
| H | -2.14284800 | 1.06090400  | -2.90926300 |
| C | -5.48741300 | 1.37612300  | -2.41546800 |
| H | -6.45410900 | 1.32231100  | -0.49001600 |
| H | -4.23239500 | 1.39588800  | -4.17080100 |
| H | -6.41000800 | 1.52650400  | -2.96898800 |
| C | 2.43231800  | -2.56063400 | -0.62477400 |
| C | 2.94827400  | -3.61737000 | 0.14147300  |
| C | 2.44200700  | -2.68262200 | -2.02234100 |
| C | 3.48706600  | -4.74573100 | -0.47857200 |
| H | 2.91319700  | -3.56901700 | 1.22218500  |
| C | 2.97607800  | -3.81307600 | -2.64183400 |
| H | 2.02855700  | -1.88971400 | -2.63378200 |
| C | 3.50605400  | -4.84797900 | -1.86986200 |
| H | 3.88415900  | -5.55113200 | 0.13278100  |
| H | 2.97537700  | -3.88384300 | -3.72624600 |
| H | 3.92368000  | -5.72939400 | -2.34854300 |
| C | 2.52892400  | -0.84912200 | 1.73672900  |
| C | 3.90601900  | -1.09177100 | 1.86898000  |
| C | 1.82599500  | -0.34287400 | 2.83872000  |
| C | 4.55766300  | -0.83863100 | 3.07646200  |
| H | 4.47405100  | -1.47990200 | 1.03101700  |
| C | 2.47938600  | -0.08268300 | 4.04374400  |
| H | 0.76132100  | -0.16318400 | 2.75398100  |
| C | 3.84675800  | -0.33313400 | 4.16626000  |
| H | 5.62265800  | -1.03524600 | 3.16287900  |
| H | 1.91565900  | 0.30494800  | 4.88762500  |
| H | 4.35574900  | -0.13882500 | 5.10643200  |
| C | -1.91622500 | 1.35259000  | 1.60988400  |
| C | -2.43183000 | 2.64693400  | 1.80485700  |
| C | -1.78028200 | 0.51433400  | 2.72846800  |
| C | -2.76084700 | 3.09686100  | 3.08385600  |
| H | -2.59281000 | 3.30609700  | 0.96044600  |
| C | -2.11550300 | 0.96388300  | 4.00787700  |
| H | -1.43168900 | -0.50579600 | 2.58345300  |
| C | -2.59838300 | 2.25961200  | 4.18983200  |
| H | -3.15103500 | 4.10264500  | 3.21300300  |
| H | -2.00589900 | 0.29407300  | 4.85602800  |

|    |             |             |             |
|----|-------------|-------------|-------------|
| H  | -2.85933600 | 2.61225900  | 5.18402500  |
| P  | -2.79240200 | -2.42726500 | 0.05026300  |
| O  | -3.93484200 | -1.97710700 | 1.12752000  |
| O  | -2.70418000 | -4.05276300 | 0.08972400  |
| O  | -3.67642800 | -2.18054300 | -1.32535000 |
| C  | -3.82651800 | -4.93008100 | -0.02567900 |
| H  | -4.55608200 | -4.56573800 | -0.75687900 |
| H  | -3.43838500 | -5.89707600 | -0.35303400 |
| H  | -4.31067900 | -5.05515300 | 0.94859000  |
| C  | -5.35651000 | -2.09203300 | 0.95851400  |
| H  | -5.66635600 | -1.69549400 | -0.01012600 |
| H  | -5.68378400 | -3.13144600 | 1.05585800  |
| H  | -5.80629700 | -1.50398000 | 1.76135700  |
| C  | -3.07964200 | -2.49271200 | -2.58773200 |
| H  | -3.05861000 | -3.57588200 | -2.75315300 |
| H  | -3.69348800 | -2.01531000 | -3.35361100 |
| H  | -2.05674600 | -2.10574200 | -2.64686400 |
| Rh | -0.73332800 | -1.46341300 | 0.27528400  |
| Cl | -0.02931500 | -3.38236800 | 1.58015800  |
